# Supplementary material
Source: HighWire-hosted journal article supplement (https://jitc.bmj.com/content/10/11/e005503)
Supplement: inline-supplementary-material-2 [file inline-supplementary-material-2.xlsx]

## Sheet: Sheet1
Docking results of 638 compounds with APOBEC3B
Mol ID	Molecular formula	S score	RMSD	Molecule weight	logP(o/w)
T1130	O=C(NC(C(=O)NC(C(=O)NC(C(=O)NC(C(=O)NC(C(=O)NC(C(=O)NC(C(=O)NC(C(=O)NCCO)Cc1c2c([nH]c1)cccc2)CC(C)C)Cc1c2c([nH]c1)cccc2)CC(C)C)Cc1c2c([nH]c1)cccc2)CC(C)C)Cc1c2c([nH]c1)cccc2)C(C)C)C(NC(=O)C(NC(=O)C(NC(=O)C(NC(=O)C(NC(=O)CNC(=O)C(NC=O)C(C)C)C)CC(C)C)C)C(C)C)C(C)C	-12.4949	2.99822	1882.33	9.347
T3237	P(=O)(OCC(OC(=O)CCCCCCC/C=C/C/C=C/CCCCC)COC(=O)CCCCCCCCCCCCCCC)(OCC[N+](C)(C)C)[O-]	-11.8071	2.2157	758.075	9.85648
T2796	O(C)C=1C(=O)C(C/C=C(\CC/C=C(\CC/C=C(\CC/C=C(\CC/C=C(\CC/C=C(\CC/C=C(\CC/C=C(\CC/C=C(\CC/C=C(\C)/C)/C)/C)/C)/C)/C)/C)/C)/C)/C)=C(C)C(=O)C=1OC	-11.5133	3.94457	863.365	8.92774
T0801	O=C(OCC1C(OC(=O)c2cc(OC(=O)c3cc(O)c(O)c(O)c3)c(O)c(O)c2)C(OC(=O)c2cc(OC(=O)c3cc(O)c(O)c(O)c3)c(O)c(O)c2)C(OC(=O)c2cc(OC(=O)c3cc(O)c(O)c(O)c3)c(O)c(O)c2)C(OC(=O)c2cc(OC(=O)c3cc(O)c(O)c(O)c3)c(O)c(O)c2)O1)c1cc(OC(=O)c2cc(O)c(O)c(O)c2)c(O)c(O)c1	-11.3945	5.07385	1701.21	8.55322
T1715	O=C(OC)NC1C(O)C(OC2C(N)C(O)C(OC3C(N)C(O)C(OC4C(N)C(O)C(OC5C(N)C(O)C(OC6C(N)C(O)C(OC7C(N)C(O)C(O)C(CO)O7)C(CO)O6)C(CO)O5)C(CO)O4)C(CO)O3)C(CO)O2)C(CO)OC1OC1C(O)C(N)C(OC2C(O)C(N)C(O)OC2CO)OC1CO	-11.1645	3.18373	1526.46	-19.803
T3136	P(=O)(OC(CNC(=O)CCC1(C)C(CC(=O)N)C2C3(C)C(CC(=O)N)(C)C(CCC(=O)N)/C(=C(\C)/C=4C(CC(=O)N)(C)C(CCC(=O)N)/C(/N=4)=C\C=4C(C)(C)C(CCC(=O)N)/C(=C(\C)/C1=N2)/N=4)/[N-]3)C)(OC1C(O)C(n2c3c(nc2)cc(C)c(C)c3)OC1CO)[O-]	-10.8107	2.82861	1270.44	-3.463
T3253	O=C(OC(COC(=O)CCCCCCCCCCC(O)CCCCCC)COC(=O)CCCCCCCCCCC(O)CCCCCC)CCCCCCCCCCC(O)CCCCCC	-10.7395	5.71122	939.498	17.8695
T1100	O=C(NC(C(=O)NC1C(=O)NC(CCN)C(=O)NC(Cc2ccccc2)C(=O)NC(CC(C)C)C(=O)NC(CCN)C(=O)NC(CCN)C(=O)NC(C(O)C)C(=O)NCC1)CCN)C(NC(=O)C(NC(=O)CCCCC(CC)C)CCN)C(O)C	-10.4244	3.09961	1203.5	-4.047
T2721	O(C1C(O)C(O)C(OC2C(O)CC3(C)C4C(C5C(C)(C6C(C)C7(OC6C5O)OCC(C)CC7)CC4)CCC3C2)OC1CO)C1C(OC2C(O)C(OC3C(O)C(O)C(O)C(CO)O3)C(O)C(CO)O2)C(OC2C(O)C(O)C(O)CO2)C(O)C(CO)O1	-10.4236	2.42405	1229.32	-4.34352
T1226	O=C(NC1C(=O)NC(CCCN)C(=O)NC(C(CC)C)C(=O)NC(Cc2ccccc2)C(=O)NC(Cc2[nH]cnc2)C(=O)NC(CC(=O)O)C(=O)NC(CC(=O)N)C(=O)NCCCC1)C(NC(=O)C(NC(=O)C(NC(=O)C1SC(C(N)C(CC)C)=NC1)CC(C)C)CCC(=O)O)C(CC)C	-10.3791	3.71449	1422.72	-0.776
T1245	O=C(NC(C(=O)NC1C(=O)NC(CCN)C(=O)NC(CC(C)C)C(=O)NC(CC(C)C)C(=O)NC(CCN)C(=O)NC(CCN)C(=O)NC(C(O)C)C(=O)NCC1)CCN)C(NC(=O)C(NC(=O)CCCC(CC)C)CCN)C(O)C	-10.1212	3.69747	1155.45	-4.61
T2822	O(C(CC/C=C(\C)/C)(C)C1C2C(C)(C3(C)C(C4(C)C(C(C)(C)C(OC5C(OC6C(O)C(O)C(O)C(CO)O6)C(O)C(O)C(CO)O5)CC4)CC3)CC2O)CC1)C1C(O)C(O)C(O)C(COC2C(O)C(O)C(O)C(CO)O2)O1	-10.0324	3.37195	1109.31	-1.49926
T0278	O=C(OC1C(C)(C)CC2C(CO)(C1OC(=O)C)C(O)CC1(C)C3(C)C(C4(C)C(C(CO)(C)C(OC5C(OC6C(O)C(O)C(O)C(CO)O6)C(O)C(OC6C(O)C(O)C(O)C(CO)O6)C(C(=O)O)O5)CC4)CC3)CC=C21)/C(=C\C)/C	-9.93041	2.38208	1131.27	-1.77752
T2823	O=C(OC1C(O)C(O)C(O)C(COC2C(O)C(O)C(O)C(CO)O2)O1)/C(=C\C=C\C(=C/C=C/C=C(\C=C\C=C(/C(=O)OC1C(O)C(O)C(O)C(COC2C(O)C(O)C(O)C(CO)O2)O1)\C)/C)\C)/C	-9.91562	1.54172	976.972	-4.376
T2978	O(C(C(O)(C)C)CCC(C)C1C2(C)C(C)(C3C(C)(C(O)C2)C2C(C(C)(C)C(OC4C(O)C(O)C(O)C(COC5C(O)C(O)C(O)C(CO)O5)O4)CC2)=CC3)CC1)C1C(OC2C(O)C(O)C(O)C(CO)O2)C(O)C(O)C(COC2C(O)C(O)C(O)C(CO)O2)O1	-9.89375	1.90037	1287.45	-4.55526
T2727	O=C(OC(C(=O)O)Cc1cc(O)c(O)cc1)/C=C/c1c2C(C(=O)OC(C(=O)O)Cc3cc(O)c(O)cc3)C(c3cc(O)c(O)cc3)Oc2c(O)cc1	-9.86024	1.96264	718.62	4.837
T2985	O=CC12C(C(C)(C)C(OC3C(OC4C(O)C(O)C(O)C(C)O4)C(OC4C(O)C(O)C(O)CO4)C(O)CO3)CC1)CCC1(C)C3(C)C(C(C(O)(COC4C(O)C(O)C(O)C(CO)O4)CC/C=C(\C)/C)CC3)CCC21	-9.84544	2.56535	1047.24	-0.72952
T1679	O=C(NC(C(=O)N)=C)C(NC(=O)c1nc(C2=NC3c4nc(sc4)C4C(C)OC(=O)c5nc6C(O)C(NC(C(CC)C)C(=O)NC(C)C(=O)NC(=C)C(=O)NC(C)C(=O)NC3(c3scc(C(=O)NC(C(O)C)C(=O)N/C(=C/C)/C=7SCC(C(=O)NC(C(O)(C(O)C)C)c8scc(C(=O)N4)n8)N=7)n3)CC2)C=Cc6c(C(O)C)c5)sc1)=C	-9.69607	1.39316	1664.92	-1.552
T3236	OC/C=C(\CC/C=C(\CC/C=C(\CC/C=C(\CC/C=C(\CC/C=C(\CC/C=C(\CC/C=C(\CC/C=C(\C)/C)/C)/C)/C)/C)/C)/C)/C)/C	-9.66792	3.64477	631.086	7.322
T0967	Clc1c2Oc3c(OC4C(NC(=O)CCCCCCCCC)C(O)C(O)C(CO)O4)c4Oc5c(Cl)cc(cc5)CC5C(=O)NC(C(=O)NC(C(=O)NC6C(=O)NC(C(=O)NC(C(=O)O)c7c(c(OC8C(O)C(O)C(O)C(CO)O8)cc(O)c7)-c7c(O)ccc6c7)C(OC6C(NC(=O)C)C(O)C(O)C(CO)O6)c(c1)cc2)c(c3)c4)c1cc(O)cc(Oc2c(O)ccc(C(N)C(=O)N5)c2)c1	-9.63755	2.30754	1879.68	2.183
T1678	O=C(O)C1C(O)CC(=O)CC(O)C(O)CCC(O)CC(O)CC(O)CC(=O)OC(C)C(C)C(O)C(C)/C=C\C=C\CC/C=C/C=C/C=C/C=C/C(OC2C(O)C(N)C(O)C(C)O2)CC1O	-9.45417	2.75874	926.107	0.686
T1034	O=C(OC(C)(C)C)NC(C(O)C(=O)OC1C(C)=C2C(C)(C)C(O)(C(OC(=O)c3ccccc3)C3C(C)(C(=O)C2O)C(O)CC2C3(OC(=O)C)CO2)C1)c1ccccc1	-9.29601	2.63493	807.89	3.58
T2715	O=C(OC1C(OC2C(O)C(OC3C(O)C(O)C(O)CO3)C(O)C(C)O2)C(O)C(O)CO1)C12C(C=3C(C)(C4(C)C(C5(C)C(C6(C)C(C(O)C5)OC5OC(CO)C(O)C(O)C5OC5OCC(O)C(O)C5OC(=O)CC(O)(C)CC(=O)OC6)CC4)CC=3)CC1)CC(C)(C)CC2	-9.26698	2.53898	1319.45	-2.59226
T1670	O=C(OC1C(OC2C(O)C(O)C(O)C(CO)O2)C(C)OC(OC2C(C)OC(OC3C(C)OC(OC4CC5C(C)(C6C(C7(O)C(C)(C(O)C6)C(C6=CC(=O)OC6)CC7)CC5)CC4)CC3O)CC2O)C1)C	-9.22152	2.49205	985.127	1.74874
T0819	O=CCC1C(OC2C(O)C(N(C)C)C(OC3OC(C)C(O)C(O)(C)C3)C(C)O2)C(OC)C(O)CC(=O)OC(C)C/C=C\C=C\C(OC2OC(C)C(N(C)C)CC2)C(C)C1	-9.21731	1.63467	843.065	3.02774
T2737	O(C)c1c(O)cc(C2Oc3c(c(O)cc(OC4C(OC5C(O)C(O)C(O)C(C)O5)C(O)C(O)C(CO)O4)c3)C(=O)C2)cc1	-9.12926	2.20534	610.565	-1.02226
T2813	O=C(OC1C(O)C(O)C(O)C(COC2C(O)C(O)C(OC3C(O)C(O)C(O)C(C)O3)C(CO)O2)O1)C12C(C(C)C(C)CC1)C=1C(C)(C3(C)C(C4(C)C(C(CO)(C)C(O)C(O)C4)C(O)C3)CC=1)CC2	-9.10653	1.73796	975.132	-1.871
T2760	Ic1c(O)c(I)cc(CC(N)C(=O)O)c1	-9.08165	0.912084	432.983	3.139
T3025	O=C(OC1C(O)C(O)C(O)C(COC2C(O)C(O)C(OC3C(O)C(O)C(O)C(C)O3)C(CO)O2)O1)C12C(C(C)C(C)CC1)C=1C(C)(C3(C)C(C4(C)C(C(CO)(C)C(O)C(O)C4)CC3)CC=1)CC2	-9.06123	2.96123	959.133	-0.856
T1716	O=C(OC1C(OC2C(O)C(O)C(O)C(C)O2)C(O)C(OCCc2cc(O)c(O)cc2)OC1COC1C(O)C(O)C(O)C(CO)O1)/C=C/c1cc(O)c(O)cc1	-9.05142	3.53313	786.733	-1.75626
T1609	P(=O)(OP(=O)(OCC1C(O)C(O)C(n2c3ncnc(N)c3nc2)O1)[O-])(OCC1C(O)C(O)C([n+]2cc(C(=O)N)ccc2)O1)[O-]	-9.03418	2.37176	662.422	-4.79494
T3235	O=C(OC1C(O)C(O)C(O)C(CO)O1)C1(C)C2C(C)(C3C4(CC(=C)C(OC5C(O)C(OC6C(OC7C(O)C(O)C(O)C(CO)O7)C(O)C(O)C(CO)O6)C(O)C(CO)O5)(C4)CC3)CC2)CCC1	-8.98705	2.2315	967.021	-4.44226
T3027	O=C(OCC12C(O)C3C(C)(C)CC1C=1C(C)(C4(C)C(C5(C)C(C(CO)(C)C(OC6C(OC7C(O)C(O)C(O)CO7)C(O)C(OC7C(O)C(O)C(O)C(CO)O7)C(C(=O)O)O6)CC5)CC4)CC=1)CC2O3)C(C(OC(=O)C)C)C	-8.98106	4.38152	1101.24	-0.59026
T0848	O=C([O-])[C@H]([N+H3])Cc1cc(O)c(O)cc1	-8.96565	2.00798	197.19	0.416
T1537	O=C1C2(O)C(C)CCC(O2)CC(OC)/C(/C)=C/C=C/C=C/C(C)CC(C)C(=O)C(OC)C(O)/C(/C)=C\C(C)C(=O)CC(C(CC2CC(OC)C(O)CC2)C)OC(=O)C2N(C1=O)CCCC2	-8.95569	2.84407	914.187	6.874
T2961	O(C(CC/C=C(\C)/C)(C)C1C2C(C)(C3(C)C(C4(C)C(C(C)(C)C(O)CC4)C(OC4C(OC5C(O)C(O)C(O)CO5)C(O)C(O)C(CO)O4)C3)CC2O)CC1)C1C(O)C(O)C(O)C(CO)O1	-8.93326	2.13447	933.139	-0.02526
T0945	O=C1N(C)C(C(O)C(C/C=C/C)C)C(=O)NC(CC)C(=O)N(C)CC(=O)N(C)C(CC(C)C)C(=O)NC(C(C)C)C(=O)N(C)C(CC(C)C)C(=O)NC(C)C(=O)NC(C)C(=O)N(C)C(CC(C)C)C(=O)N(C)C(CC(C)C)C(=O)N(C)C1C(C)C	-8.92882	2.52471	1202.63	5.292
T1067	O=C(O)C1C(O)CC2(O)OC1CC(OC1C(O)C(N)C(O)C(C)O1)/C=C/C=C/C=C/C=C/C=C/C=C\C=C\C(C)C(O)C(C)C(C)OC(=O)CC(O)CC(O)CCC(O)C(O)CC(O)C2	-8.89775	3.0386	924.091	2.674
T3092	O=C([O-])C(C)C1C(C)CCC(CC2OC3(C(C)C(OC)C2)C(C)CC(C)(C2OC(C)(C4C(C)CC(C5C(C)CC(C)C(O)(CO)O5)O4)CC2)O3)O1	-8.88463	1.81864	723.965	8.704
T2720	O(C(CC/C=C(\C)/C)(C)C1C2C(C)(C3(C)C(C4(C)C(C(C)(C)C(OC5C(OC6C(O)C(O)C(O)C(CO)O6)C(O)C(O)C(CO)O5)CC4)CC3)CC2O)CC1)C1C(O)C(O)C(O)C(COC2C(O)C(O)C(CO)O2)O1	-8.87845	3.45815	1079.28	-0.92626
T2873	O(C1C(O)C(O)C(CO)OC1OC1C2C(C)(C)C(O)CCC2(C)C2C(C)(C3(C)C(C(O)C2)C(C(O)(CC/C=C(\C)/C)C)CC3)C1)C1C(O)C(O)C(O)C(C)O1	-8.87434	1.6353	785.025	2.35274
T1003	O=CCC1C(OC2C(O)C(N(C)C)C(OC3OC(C)C(O)C(O)(C)C3)C(C)O2)C(C)C(O)CC(=O)OC(CC)C(COC2C(OC)C(OC)C(O)C(C)O2)/C=C(\C)/C=C/C(=O)C(C)C1	-8.80515	3.48427	916.112	1.77048
T0966	O=C(O)c1cc(O)c2C(=O)c3c(OC4C(O)C(O)C(O)C(CO)O4)cccc3C(C3c4c(c(O)cc(C(=O)O)c4)C(=O)c4c(OC5C(O)C(O)C(O)C(CO)O5)cccc34)c2c1	-8.79466	3.98978	862.746	0.152
T3051	O=C(OC1C(C2=CC(=O)C(O)=C3C(O)=C(O)C=C(C4C(O)Cc5c(O)cc(O)cc5O4)C3=C2)OCc2c1c(O)cc(O)c2)c1cc(O)c(O)c(O)c1	-8.74755	2.59852	716.604	3.818
T2891	O=C(O)C1(C)CC2C(C)(CCC3(C)C4(C)C(C(=O)C=C23)C2(C)C(C(C)(C)C(OC3C(OC5C(O)C(O)C(O)C(C(=O)O)O5)C(O)C(O)C(C(=O)O)O3)CC2)CC4)CC1	-8.686	2.62547	822.942	1.91074
T2911	O=C(OC1C(O)C(O)C(O)C(CO)O1)C1(C)C2C(C)(C3C4(CC(=C)C(OC5C(OC6C(O)C(O)C(O)C(CO)O6)C(O)C(O)C(CO)O5)(C4)CC3)CC2)CCC1	-8.62488	3.81284	804.88	-2.52626
T0878	O(C)c1c(O)cc(C=2Oc3c(c(O)cc(OC4C(O)C(O)C(O)C(COC5C(O)C(O)C(O)C(C)O5)O4)c3)C(=O)C=2)cc1	-8.61834	2.84173	608.549	-0.62
T1194	O=C1OCC(C2C3(C)C(O)(C4C(C5(C)C(CC(OC6OC(C)C(OC7OC(C)C(OC8OC(C)C(O)C(O)C8)C(O)C7)C(O)C6)CC5)CC4)CC3O)CC2)=C1	-8.59398	1.89513	780.949	3.324
T0486	O=C(Oc1cc2c(CC)c3c(nc2cc1)C=1N(C(=O)C2=C(C(O)(CC)C(=O)OC2)C=1)C3)N1CCC(N2CCCCC2)CC1	-8.58309	1.23803	586.689	4.351
T2878	O(C(CC/C=C(\C)/C)(C)C1C2C(C)(C3(C)C(C4(C)C(C(C)(C)C(O)CC4)C(OC4C(OC5C(O)C(O)C(O)C(CO)O5)C(O)C(O)C(CO)O4)C3)CC2O)CC1)C1C(O)C(O)C(O)C(CO)O1	-8.56916	2.49455	963.165	-0.59826
T3055	O(C)c1c(OC)cc2c(C(Cc3cc(Oc4c(OC)cc5c(C(Cc6ccc(O)cc6)N(C)CC5)c4)c(O)cc3)N(C)CC2)c1	-8.56152	1.8495	610.751	6.35448
T0595	O=C1c2c(O)cc(OC3C(OC4C(O)C(O)C(O)C(C)O4)C(O)C(O)C(CO)O3)cc2OC(c2ccc(O)cc2)C1	-8.55027	1.96472	580.539	-1.01326
T2951	OCC1OC2C(O)C(O)C1OC1C(O)C(O)C(C(CO)O1)OC1C(O)C(O)C(C(CO)O1)OC1C(O)C(O)C(C(CO)O1)OC1C(O)C(O)C(C(CO)O1)OC1C(O)C(O)C(C(CO)O1)OC1C(O)C(O)C(C(CO)O1)O2	-8.44261	2.50589	1134.99	-13.474
T2934	O=C(O)CCc1c(C)c(/C=C/2\C(C=C)=C(C)C(=O)N\2)[nH]c1Cc1c(CCC(=O)O)c(C)c(/C=C\2/C(C)=C(C=C)C(=O)N/2)[nH]1	-8.43333	4.90276	584.673	4.17
T2755	O=C1c2c(O)cc(OC3C(OC4C(O)C(O)C(O)C(C)O4)C(O)C(O)C(CO)O3)cc2OC(c2ccc(O)cc2)=C1	-8.33853	1.6505	578.523	-0.85926
T2713	O(CC1C(O)C(O)C(O)C(OC2(CO)C(O)C(O)C(CO)O2)O1)C1C(O)C(O)C(O)C(COC2C(O)C(O)C(O)C(CO)O2)O1	-8.33506	1.53353	666.579	-8.198
T3238	O=C(OCCCCCCCCCCCCCCCCCC)CCCCCCCCCCCCCCC	-8.32842	2.52715	508.916	13.991
T2767	O=C(CCc1cc(O)c(OC)cc1)c1c(O)cc(OC2C(OC3C(O)C(O)C(O)C(C)O3)C(O)C(O)C(CO)O2)cc1O	-8.28844	1.66524	612.581	-0.96726
T1035	O(C)c1c(O)cc(C2Oc3c(c(O)cc(OC4C(O)C(O)C(O)C(COC5C(O)C(O)C(O)C(C)O5)O4)c3)C(=O)C2)cc1	-8.23891	1.73458	610.565	-0.774
T2598	O=C(O)C(NC(=O)C(NC(=O)C(NC(=O)C(NC(=O)C(N)CCC/N=C(\N)/N)CCCCN)CC(=O)O)C(C)C)Cc1ccc(O)cc1	-8.23832	2.0208	679.776	-1.264
T0968	O=C(OC1C(C)=C2C(C)(C)C(O)(C(OC(=O)c3ccccc3)C3C(C)(C(=O)C2OC(=O)C)C(O)CC2C3(OC(=O)C)CO2)C1)C(O)C(NC(=O)c1ccccc1)c1ccccc1	-8.2367	2.70376	853.918	4.335
T1104	O(C1C(OC2C(N)C(O)C(O)C(CO)O2)C(N)CC(N)C1O)C1C(O)C(OC2C(N)C(O)C(O)C(CN)O2)C(CO)O1	-8.23586	1.64476	615.634	-9.01826
T0228	O(C)c1c(OC)ccc(C2Oc3c(c(O)cc(OC4C(O)C(O)C(O)C(COC5C(O)C(O)C(O)C(C)O5)O4)c3)C(=O)C2)c1	-8.17045	1.46996	624.592	-0.75826
T0791	O=C(OC1C(OC)C(C(=O)OC)C2C(C1)CN1C(c3[nH]c4c(c3CC1)ccc(OC)c4)C2)c1cc(OC)c(OC)c(OC)c1	-8.14986	1.54719	608.688	3.68122
T2791	O(C)c1c(O)c2C(=O)C=C(c3ccc(OC)cc3)Oc2cc1OC1C(O)C(O)C(O)C(COC2C(O)C(O)C(O)C(C)O2)O1	-8.1411	1.69635	622.576	-0.68026
T3138	O=C1C(C)=C(/C=C/C(=C\C=C\C(=C/C=C/C=C(\C=C\C=C(/C=C/C2=C(C)C(=O)C(O)CC2(C)C)\C)/C)\C)/C)C(C)(C)CC1O	-8.13677	2.31035	596.852	7.506
T0295	O=C1OCC(C2C3(C)C(O)(C4C(C5(C)C(CC(OC6OC(C)C(OC7OC(C)C(OC8OC(C)C(O)C(O)C8)C(O)C7)C(O)C6)CC5)CC4)CC3)CC2)=C1	-8.13526	1.8222	764.95	4.339
T1131	O=C1OC2CC3(OC(C(CC)C)C(C)CC3)OC(C/C=C(/C)\C(OC3OC(C)C(OC4OC(C)C(O)C(OC)C4)C(OC)C3)C(C)/C=C/C=C/3\C4(O)C(C(O)C(C)=CC14)OC\3)C2	-8.13278	3.33736	875.106	6.32474
T2217	O=C(NC(C(O)C(=O)OC1C(C)=C2C(C)(C)C(O)(C(OC(=O)c3ccccc3)C3C(C)(C(=O)C2OC(=O)C)C(O)CC2C3(OC(=O)C)CO2)C1)c1ccccc1)/C(=C\C)/C	-8.10862	1.89377	831.912	3.361
T2855	O(C)c1ccc(C2=C(OC3C(O)C(O)C(O)C(C)O3)C(=O)c3c(O)cc(OC4C(O)C(O)C(O)C(CO)O4)c(C/C=C(\C)/C)c3O2)cc1	-8.09224	2.37311	676.668	0.109
T2698	O=C(OC1C(O)C(O)C(O)C(COC2C(O)C(O)C(O)C(CO)O2)O1)C12C(C=3C(C)(C4(C)C(C5(C)C(C(CO)(C)C(OC6C(O)C(O)C(O)CO6)CC5)CC4)CC=3)CC1)CC(C)(C)CC2	-8.07471	5.13746	929.107	-0.262
T3054	O(C)c1c(OC)cc2c(C(Cc3ccc(Oc4c(O)ccc(CC5N(C)CCc6c5cc(O)c(OC)c6)c4)cc3)N(C)CC2)c1	-8.06267	3.42738	610.751	6.60274
T2789	O=C(O)C1C(O)C(O)C(O)C(Oc2c(O)c(O)c3C(=O)C=C(c4ccc(O)cc4)Oc3c2)O1	-8.02269	1.2033	462.363	0.12
T0247	O(C1C(O)C(O)C(O)OC1CO)C1C(O)C(O)C(OC2C(O)C(O)C(NC3C(O)C(O)C(O)C(CO)=C3)C(C)O2)C(CO)O1	-8.02235	1.51177	645.608	-7.508
T6520	Oc1c(C2C(O)C(c3cc(O)c(O)cc3)Oc3c2c(O)cc(O)c3)c2OC(c3cc(O)c(O)cc3)C(O)(C)Cc2c(C)c1	-8.02153	1.3672	590.581	4.669
T2960	O=C(OC1C(C)=C2C(C)(C)C(O)(C(OC(=O)c3ccccc3)C3C(C)(C(=O)C2O)C(O)CC2C3(OC(=O)C)CO2)C1)C(O)C(NC(=O)c1ccccc1)c1ccccc1	-8.01563	2.23249	811.881	3.746
T3252	OCCCCCCCCCCCCCCCCCCCCCCCCCCCCCC	-8.01126	2.22345	438.825	12.485
T1465	O=C(OCCCCCCCCC(=O)O)/C=C(\CC1C(O)C(O)C(CC2C(C(C(O)C)C)O2)CO1)/C	-8.00366	2.15584	500.629	2.726
T1075	O=C1C(C/C=C(\CCCC(CCCC(CCCC(C)C)C)C)/C)=C(C)C(=O)c2c1cccc2	-8.00266	2.35744	450.707	9.055
T2768	O(C1C(O)C(OC2C(CO)(C)C3C(C)(C4C(C)(C5(C)C6(OCC7(C(O)C5)C6CC(C)(C)CC7)C=C4)CC3)CC2)OC(C)C1O)C1C(O)C(O)C(O)C(CO)O1	-7.99544	2.43336	780.993	2.461
T3149	O=C(OC(C(=O)O)Cc1cc(O)c(O)cc1)/C=C/c1c2c(c(O)cc1)oc(-c1cc(O)c(O)cc1)c2	-7.95821	2.67478	492.436	4.665
T2849	O(C1(c2cc(O)c(O)cc2)C(O)C(O)c2c(O)cc(O)cc2O1)C1C(c2cc(O)c(O)cc2)Oc2c(c(O)cc(O)c2)C1	-7.94704	2.13415	594.525	4.299
T1419	O(C)C1(C)C(O)C(C)OC(OC2C(C)C(=O)OC(CC)C(O)(C)C(O)C(C)N(C)CC(C)CC(O)(C)C(OC3C(O)C(N(C)C)CC(C)O3)C2C)C1	-7.93008	1.77951	748.996	3.429
T0906	O=C(O)C(CC)C1OC(C(C(O)C(C(=O)C(CC)C2C(C)CC(C)C3(OC4(C(O)C=C3)OC(C)(C3OC(C)C(O)(CC)CC3)CC4)O2)C)C)C(C)CC1	-7.91516	2.82213	751.011	8.754
T2761	O=C(CCc1ccc(O)cc1)c1c(O)cc(OC2C(OC3C(O)C(O)C(O)C(C)O3)C(O)C(O)C(CO)O2)cc1O	-7.91224	1.24597	582.555	-0.95826
T0132	O(C)c1c(O)c(OC)cc(C2c3c(C(OC4C(O)C(O)C5OC(C)OCC5O4)C4C2C(=O)OC4)cc2OCOc2c3)c1	-7.89198	1.93238	588.562	1.616
T1033	O=C(O)C(C(OC)C(C)C1C(C)C(O)CC2(OC(C)(C3OC(CC)(C4C(C)CC(C5C(C)CC(C)C(O)(CO)O5)O4)CC3)CC2)O1)C	-7.84585	1.50483	670.881	7.132
T2336	O=C1C(C/C=C(\CC/C=C(\CC/C=C(\CC/C=C(\C)/C)/C)/C)/C)=C(C)C(=O)c2c1cccc2	-7.84286	2.19026	444.659	5.236
T2872	O(C(CC/C=C(\C)/C)(C)C1C2C(C)(C3(C)C(C4(C)C(C(C)(C)C(O)CC4)C(OC4C(OC5C(O)C(O)C(O)C(C)O5)C(O)C(O)C(CO)O4)C3)CC2O)CC1)C1C(O)C(O)C(O)C(CO)O1	-7.84207	2.69404	947.166	0.43674
T0062	O=C(O)C(NC(=O)c1ccc(NCc2nc3C(=O)N=C(N)Nc3nc2)cc1)CCC(=O)O	-7.81616	2.14646	441.404	-0.30447
T16600	O(C)c1c(O)ccc(C2C(CO)Oc3c(O2)cc(C2C(O)C(=O)c4c(O)cc(O)cc4O2)cc3)c1	-7.79779	1.74048	482.441	2.641
T1255	O(C1C(O)C(OC2C(N)CC(O)C(CN)O2)C(N)CC1N)C1C(O)C(N)C(O)C(CO)O1	-7.79586	1.59512	467.52	-6.412
T0795	O=C1C(OC2C(O)C(O)C(O)C(COC3C(O)C(O)C(O)C(C)O3)O2)=C(c2cc(O)c(O)cc2)Oc2c1c(O)cc(O)c2	-7.793	1.42977	610.521	-1.113
T2766	O(C)c1c(OC)ccc(CC2C(Cc3cc(OC)c(OC4C(O)C(O)C(O)C(CO)O4)cc3)C(=O)OC2)c1	-7.7907	5.1466	534.558	0.56048
T2973	O(C1C(O)C(O)C(O)CO1)C1C(C)(C)C2C(OC3C(O)C(O)C(O)C(CO)O3)CC3C4(C)C(C)(C(C5(C)OC(C(O)(C)C)CC5)C(O)C4)CCC43C2(C4)CC1	-7.78943	3.00878	784.981	1.698
T1016	O=C(Oc1c(C)c(C)c2OC(CCCC(CCCC(CCCC(C)C)C)C)(C)CCc2c1C)C	-7.78893	2.99558	472.754	10.446
T2732	O=C(OC1C(c2cc(O)c(O)cc2)Oc2c(c(O)cc(O)c2)C1)c1cc(O)c(O)c(O)c1	-7.77577	1.65187	442.376	3.376
T2777	O(C(CC/C=C(\C)/C)(C)C1C2C(C)(C3(C)C(C4(C)C(C(C)(C)C(O)CC4)C(OC4C(O)C(O)C(O)C(CO)O4)C3)CC2O)CC1)C1C(O)C(O)C(O)C(CO)O1	-7.77307	2.70435	801.024	1.566
T2481	O=C1C2(O)C(C)CC(OC)C(C(OC)CC(C)C/C(/C)=C\C(CC)C(=O)CC(O)C(C)C(/C(=C\C3CC(OC)C(O)CC3)/C)OC(=O)C3N(C1=O)CCCC3)O2	-7.76594	2.11791	792.02	4.777
T2757	O=C1C(OC2C(O)C(O)C(O)C(C)O2)=C(c2cc(O)c(O)c(O)c2)Oc2c1c(O)cc(O)c2	-7.75636	0.854401	464.379	0.53
T0969	O=C1OC2CC3(OC(C(C)C=C3)C3CCCCC3)OC(C/C=C(/C)\C(OC3OC(C)C(OC4OC(C)C(O)C(OC)C4)C(OC)C3)C(C)/C=C/C=C/3\C4(O)C(C(O)C(C)=CC14)OC\3)C2	-7.74727	1.15816	899.128	6.13274
T1668	O=C(OC1C(O)(C(=O)OC)C2N(C)c3c(cc(c(OC)c3)C3(C(=O)OC)c4[nH]c5c(c4CCN4CC(O)(CC)CC(C3)C4)cccc5)C32C2C1(CC)C=CCN2CC3)C	-7.73252	1.77748	810.989	5.17
T4461	Ic1c(Oc2ccc(O)cc2)c(I)cc(C[C@H](N)C(=O)O)c1	-7.7048	2.76146	525.08	2.22927
T0978	S(SCCNC(=O)CCNC(=O)C(O)C(CO)(C)C)CCNC(=O)CCNC(=O)C(O)C(CO)(C)C	-7.69744	2.41431	554.73	-1.656
T1712	O=C(OC1C(CCCCCC)C(=O)OC(C)C(NC(=O)c2c(O)c(NC=O)ccc2)C(=O)OC1C)CC(C)C	-7.67585	3.73326	548.633	4.351
T2922	O=C(CCc1ccc(O)cc1)c1c(OC2C(O)C(O)C(O)C(CO)O2)cc(O)cc1O	-7.66993	1.87246	436.413	0.171
T2996	O(C)c1c(OC)cc2c3c1Oc1c(OC)cc4c(c1)C(N(C)CC4)Cc1ccc(Oc4c(OC)ccc(c4)CC3N(C)CC2)cc1	-7.66521	0.987972	622.762	6.77574
T1270	O=C(OC1C(O)(C(=O)OC)C2N(C=O)c3c(cc(c(OC)c3)C3(C(=O)OC)c4[nH]c5c(c4CCN4CC(O)(CC)CC(C3)C4)cccc5)C32C2C1(CC)C=CCN2CC3)C	-7.66279	1.75436	824.972	4.72
T2959	O(C1C(O)C(O)C(O)C(CO)O1)C1C(C)(C)C2C(C)(C3C(C)(C4(C)C(C(O)C3)C(C(O)(CC/C=C(\C)/C)C)CC4)CC2)CC1	-7.66093	1.569	622.884	4.497
T1084	O(C1C(O)C(O)C(N)CC1N)C1C(N)CC2OC(OC3C(O)C(O)C(N)C(CO)O3)C(NC)C(O)C2O1	-7.65836	3.09965	539.583	-6.575
T2854	O(C)c1c(OC)ccc(C2OCC3C(c4c(OC)cc(OC5C(O)C(O)C(O)C(CO)O5)cc4)OCC23)c1	-7.64522	2.63893	534.558	0.93174
T2971	P(=O)(OC1C(OP(=O)(O)O)C(OP(=O)(O)O)C(OP(=O)(O)O)C(OP(=O)(O)O)C1OP(=O)(O)O)(O)O	-7.62966	2.02728	660.03	-10.3116
T0971	O(CCOC)CC1OC2C(O)(C)C(CC)OC(=O)C(C)C(OC3OC(C)C(O)C(OC)(C)C3)C(C)C(OC3C(O)C(N(C)C)CC(C)O3)C(O)(C)CC(C)C(C2C)N1	-7.6235	3.11701	835.086	3.66574
T2230	O=C(OCC12C3(OC4C(O)C(O)C(O)C(CO)O4)C4(C)OC1OC(O)(C2C3)C4)c1ccccc1	-7.61796	1.96663	480.466	0.029
T0956	O=C1OC2CC3(OC(C(CC)C)C(C)C=C3)OC(C/C=C(/C)\C(OC3OC(C)C(OC4OC(C)C(O)C(OC)C4)C(OC)C3)C(C)/C=C/C=C/3\C4(O)C1C=C(C)C(O)C4COC\3)C2	-7.61719	5.18104	887.117	5.90874
T6670	O(C)c1c(O)ccc(C2C(CO)Oc3c(O2)ccc(C2C(O)C(=O)c4c(O)cc(O)cc4O2)c3)c1	-7.5835	1.77864	482.441	2.641
T1121	O(C)c1c(OC)cc(C2c3c(C(O)C4C2C(=O)OC4)cc2OCOc2c3)cc1OC	-7.56908	1.6265	414.41	1.88848
T2795	O(C(C#N)c1ccccc1)C1C(O)C(O)C(O)C(COC2C(O)C(O)C(O)C(CO)O2)O1	-7.56566	2.15743	457.432	-2.839
T1717	O(C)c1c(C/C=C(\C)/C)c2C(=O)c3c(O)c(C/C=C(\C)/C)c(O)cc3Oc2cc1O	-7.56359	0.966933	410.466	3.903
T2794	O=C1C(OC2C(O)C(O)C(O)C(C)O2)C(c2ccc(O)cc2)Oc2c1c(O)cc(O)c2	-7.56052	1.24337	434.397	0.838
T2988	O=C(OC1C(c2cc(O)c(O)c(O)c2)Oc2c(c(O)cc(O)c2)C1)c1cc(O)c(O)c(O)c1	-7.53642	2.43518	458.375	3.103
T2753	S(=O)(=O)(Oc1c(C(C)C)cccc1C(C)C)NC(=O)Cc1c(C(C)C)cc(C(C)C)cc1C(C)C	-7.52411	1.05297	501.732	8.428
T1192	O=C(O)CCC1=C(C)C=2N=C1C=C1C(CCC(=O)O)=C(C)C(=N1)C=[cH0]1c(C=C)c(C)[cH0]([nH]1)=Cc1c(C=C)c(C)c([nH]1)C=2	-7.52405	2.70635	562.67	6.08
T2730	O=Cc1c(O)c(O)c(C(C)C)c2c1c(O)c(-c1c(O)c3c(C=O)c(O)c(O)c(C(C)C)c3cc1C)c(C)c2	-7.5204	1.63685	518.562	7.24
T2912	OC1CC=2C(C)(C3C(=CC=2)C2C(C)(C(C(/C=C/C(C(C)C)C)C)CC2)CC3)CC1	-7.51554	1.8752	396.659	6.21
T2532	S(=O)(=O)(O)CCNC(=O)CCC(C)C1C2(C)C(C3C(O)CC4C(C)(C3CC2)CCC(O)C4)CC1	-7.50174	1.72297	499.713	3.395
T3004	O(CC(O)CO)CCCCCCCCCCCCCCCCCC	-7.4977	1.50442	344.58	6.526
T3242	O=C(O)C1C(O)C(O)C(O)C(Oc2cc(O)c3C(=O)C=C(c4ccc(O)cc4)Oc3c2)O1	-7.48406	1.56097	446.364	0.469
T2812	P(=O)(OP(=O)(OCC1C(O)C(O)C(n2c3ncnc(N)c3nc2)O1)[O-])(OP(=O)(O)[O-])O	-7.48193	2.46	505.166	-5.06994
T2810	OC(CC/C=C(\C)/C)(C)C1C2C(C)(C3C(C4(C)C(C(C)(C)C(O)CC4)C(O)C3)CC2O)CC1	-7.46632	1.66899	462.715	4.999
T1648	Oc1c(C)c(C)c2OC(CCCC(CCCC(CCCC(C)C)C)C)(C)CCc2c1C	-7.45668	1.86742	430.717	10.205
T2815	O=C1C(c2ccc(O)cc2)=COc2c(OC3C(O)C(O)C(O)C(CO)O3)c(O)ccc12	-7.44955	1.95033	432.381	-0.325
T2871	O=C1C(OC2C(O)C(O)C(O)C(C)O2)=C(c2cc(O)c(O)cc2)Oc2c1c(O)cc(O)c2	-7.43724	1.52931	448.38	0.803
T0793	O(C1C(O)C(OC2C(O)C(N)C(O)C(CO)O2)C(N)CC1N)C1C(O)C(O)C(O)C(CN)O1	-7.43143	1.1427	484.503	-7.205
T2806	O=C(Nc1c(C(=O)OC23C4C5(C(OC)CC2)C(N(CC)C3)C(C2(O)C3(O)C(OC)C(C(OC)C2)CC53)C4)cccc1)C	-7.4189	2.44272	584.71	2.184
T2913	O=C(OC1C(O)(C)C(C)Cc2c(c(OC)c3OCOc3c2)-c2c(OC)c(OC)c(OC)cc12)c1ccccc1	-7.4154	1.91387	536.577	5.31348
T3220	O=C(OC1C(C)CC2(OC(=O)C)C(=O)/C(/C)=C\C3C(C)(C)C3CCC3(C(OC(=O)C)C12)OC3)Cc1ccccc1	-7.40685	3.18278	552.664	4.938
T3137	O=C(OC1C2(C)C(C3C(C4(C)C(=CC(=O)C=C4)CC3)CC2)CC1)CCCCCCCCC=C	-7.40319	2.75968	452.679	7.819
T2920	O(C)c1c(OC)cc2c3c1Oc1c(OC)cc4c(c1)C(N(C)CC4)Cc1ccc(Oc4c(O)ccc(c4)CC3N(C)CC2)cc1	-7.39733	2.09051	608.735	6.51174
T0060	O=CC1(O)C(OC2C(NC)C(O)C(O)C(CO)O2)C(OC2C(O)C(O)C(/N=C(\N)/N)C(O)C2/N=C(\N)/N)OC1C	-7.38837	2.29979	581.58	-6.50826
T1022	O(C1C(O)C(NC)CC(N)C1O)C1OC(CO)C(O)C2OC3(C(O)C(O)C(O)C(C(N)CO)O3)OC12	-7.38157	1.00528	527.524	-6.512
T2135	O=C(OC12C(O)C(OC)C3(O)C(OC(=O)c4ccccc4)C1C(C14C(OC)CC(O)C5(COC)C1C(OC)C2C4N(CC)C5)C3)C	-7.36474	1.65748	645.746	1.037
T2144	O=C1C2(O)C(C)CC(OC)C(C(OC)CC(C)C/C(/C)=C\C(CC=C)C(=O)CC(O)C(C)C(/C(=C\C3CC(OC)C(O)CC3)/C)OC(=O)C3N(C1=O)CCCC3)O2	-7.35666	1.69632	804.031	4.572
T0148	O=C(O)C(NC(=O)c1ccc(NCC2N(C=O)C=3C(=O)N=C(N)NC=3NC2)cc1)CCC(=O)O	-7.34268	1.45408	473.446	-0.476
T2787	O=C(OC1C2C(CO)(O2)C2C(OC3C(O)C(O)C(O)C(CO)O3)OC=CC12)/C=C/c1ccccc1	-7.33682	1.54174	492.477	-0.95
T1032	O(C)C1(C)C(O)C(C)OC(OC2C(C)C(=O)OC(CC)C(O)(C)C(O)C(C)C(=O)C(C)CC(O)(C)C(OC3C(O)C(N(C)C)CC(C)O3)C2C)C1	-7.31361	1.83618	733.937	2.761
T2964	O(c1c(O)cc(O)cc1/C=C/c1ccc(O)cc1)C1C(O)C(O)C(O)C(CO)O1	-7.30487	3.15614	406.387	1.084
T2844	O=C1C(OC2C(O)C(O)C(O)C(CO)O2)=C(c2cc(O)c(O)cc2)Oc2c1c(O)cc(O)c2	-7.27147	3.16178	464.379	-0.232
T1138	S(=O)(=O)([O-])CCNC(=O)CCC(C)C1C2(C)C(O)CC3C4(C)C(CC(O)C3C2CC1)CC(O)CC4	-7.26643	4.38577	514.704	2.33
T3021	O=C(OC12C3C(OC)C4C5(COC)CN(CC)C3C4(C(OC)CC5)C3C1C(C(=O)c1ccc(OC)cc1)C(O)(C(OC)C2)C3)C	-7.25274	1.53497	627.775	2.633
T3122	O(C)c1c(O)c2Oc3c(OC)cc4c(c3)C(N(C)CC4)Cc3ccc(Oc4c(OC)ccc(c4)CC4N(C)CCc(c24)c1)cc3	-7.24554	1.79412	608.735	6.76
T3016	O(C1(CO)C(OC2C(O)C(O)C(O)C(CO)O2)C(O)C(CO)O1)C1C(O)C(O)C(O)C(CO)O1	-7.23816	2.34272	504.438	-6.53026
T0884	OCCCCCCCCCCCCCCCCCCCCCC	-7.23044	1.25051	326.609	8.949
T2932	O(C1C(O)C(O)C(O)C(CO)O1)C1C2C(C)(C)C(O)CCC2(C)C2C(C)(C3(C)C(C(O)C2)C(C(O)(CC/C=C(\C)/C)C)CC3)C1	-7.22397	2.2261	638.883	3.482
T2714	O(C)c1c(OC)ccc2c1CN1C(c3c(cc(OC)c(OC)c3)CC1)C2	-7.22237	2.99816	355.434	3.07148
T3012	O=C1c2c(O)c(c(O)cc2Oc2c1cc(O)c(O)c2)C1C(O)C(O)C(O)C(CO)O1	-7.20033	1.54374	422.342	-0.901
T2874	O(C)c1c(OC)ccc2c1CN1C(c3c(cc4OCOc4c3)CC1)C2	-7.19054	1.88219	339.391	3.07774
T2938	O(c1cc(O)cc(/C=C/c2ccc(O)cc2)c1)C1C(O)C(O)C(O)C(CO)O1	-7.16461	1.84048	390.388	1.433
T2756	O=C1OCCC2(O)C(C=C)C(OC3C(O)C(O)C(O)C(CO)O3)OC=C12	-7.16356	1.64995	374.342	-2.455
T3427	O(c1cc(O)cc(/C=C/c2ccc(O)cc2)c1)C1C(O)C(O)C(O)C(CO)O1	-7.1631	1.96702	390.388	1.433
T2212	O=C(OC)C1=COC(OC2C(O)C(O)C(O)C(CO)O2)C2C(CO)=CCC12	-7.16224	1.24218	388.369	-3.151
T1318	O=C1OCC(C2C3(C)C(O)(C4C(C5(CO)C(O)(CC(OC6C(O)C(O)C(O)C(C)O6)CC5O)CC4)C(O)C3)CC2)=C1	-7.15867	3.10368	584.659	-0.975
T0320	O=C(NC1C=2C(c3c(OC)c(OC)c(OC)cc3CC1)=CC=C(OC)C(=O)C=2)C	-7.15537	1.19655	399.443	2.20848
T2950	O(C)c1c(OC)c2-c3c(OC)c(OC)c(OC)cc3CC(C)C(O)(C)Cc2cc1OC	-7.13266	1.81894	432.513	3.46896
T2831	O=C([O-])CNC(=O)CCC(C)C1C2(C)C(O)CC3C4(C)C(CC(O)C3C2CC1)CC(O)CC4	-7.10609	2.08072	464.623	3.147
T1086	OC1C/C(=C\C=C\2/C3C(C)(C(C(/C=C/C(C(C)C)C)C)CC3)CCC/2)/C(=C)CC1	-7.10009	3.6065	396.659	6.63
T2957	O(C)c1c(OC)ccc(CC2C(Cc3cc(OC)c(O)cc3)C(=O)OC2)c1	-7.0904	2.21722	372.417	3.07274
T2728	O=C1OC(c2cocc2)C2(C)C3(C4(C)C(=O)CC5C(C)(C)OC6C5(C4CC2)COC(=O)C6)OC13	-7.07686	1.06142	470.518	1.943
T2142	O=C(OC)C1C(O)CCC2C1CC1N(C2)CCc2c3c([nH]c12)cccc3	-7.0714	1.17007	354.45	2.647
T1516	O=C(/C=C/c1cc(OC)c(O)cc1)CC(=O)/C=C/c1cc(OC)c(O)cc1	-7.07073	1.53617	368.385	3.718
T2820	O(C)c1c(OC2C(O)C(O)C(O)C(CO)O2)cc2OC=C(c3ccc(O)cc3)C(=O)c2c1	-7.06345	2.91822	446.408	-0.33326
T2834	O(C)c1c(OC)c(OC)c2OC(c3cc(OC)c(OC)cc3)=CC(=O)c2c1OC	-7.05924	1.47693	402.399	2.15396
T0408	O=C(O)CCC(C)C1C2(C)C(=O)CC3C4(C)C(CC(=O)C3C2CC1)CC(=O)CC4	-7.05851	0.930595	402.531	2.14
T2824	O=C(OC1C(O)C(O)C(O)C(CO)O1)C12C(C(O)(C)C(C)CC1)C=1C(C)(C3(C)C(C4(C)C(C(CO)(C)C(O)CC4)CC3)CC=1)CC2	-7.05079	2.24552	650.85	1.99
T3233	O=C1C(c2ccc(OC3C(O)C(O)C(O)C(CO)O3)cc2)=COc2c1c(O)cc(O)c2	-7.04376	5.69367	432.381	-0.349
T2899	O=C1c2c(OC(c3ccc(OC4C(O)C(O)C(O)C(CO)O4)cc3)C1)cc(O)cc2	-7.04029	1.66054	418.398	0.389
T1321	O=C(NCc1cc(OC)c(O)cc1)CCCCCCCC	-6.99923	1.57785	293.407	4.141
T0700	O=C(O)CCC(C)C1C2(C)C(C3C(O)CC4C(C)(C3CC2)CCC(O)C4)CC1	-6.97209	1.12949	392.58	4.914
T2775	O=C(O)C1C(O)C(O)C(O)C(Oc2c(O)c(O)c3C(=O)C=C(c4ccccc4)Oc3c2)O1	-6.96868	2.06146	446.364	0.428
T2759	O=C(OC)C1=COC(OC2C(O)C(O)C(O)C(CO)O2)C2C(C)C(O)CC12	-6.96606	2.71312	390.385	-2.096
T3056	O(C)c1c(C/C=C(\C)/C)cc2C(=O)CC(c3ccc(O)cc3)Oc2c1	-6.94671	0.917028	338.403	4.026
T0742	O(C)c1c(OC)ccc(Cc2nccc3c2cc(OC)c(OC)c3)c1	-6.92862	1.80953	339.391	3.33748
T0937	O=C1N=C2N(CC(O)C(O)C(O)CO)c3c(N=C2C(=O)N1)cc(C)c(C)c3	-6.90845	1.36997	376.369	-1.212
T2850	O=C1OC(C2N(C)CCc3c2cc2OCOc2c3)c2c1c1OCOc1cc2	-6.90691	1.46947	367.357	2.886
T2764	O=C1C(O)(CC)C2=C(C(=O)N3C(c4nc5c(cc(O)cc5)cc4C3)=C2)CO1	-6.89133	1.59289	364.357	2.033
T2925	O(C)c1c(OC)c2-c3c(OC)c4OCOc4cc3CC(C)C(C)Cc2cc1OC	-6.87983	1.37794	400.471	4.68948
T2919	c1(C2OCC3C(c4cc5OCOc5cc4)OCC23)cc2OCOc2cc1	-6.87177	4.05214	354.358	3.224
T1723	P(=O)(OP(=O)(O)O)(OCC1C(O)C(O)C(n2c3ncnc(N)c3nc2)O1)O	-6.8683	1.34423	427.203	-4.08794
T2136	O=C(O)C1=COC(OC2C(O)C(O)C(O)C(CO)O2)C2C(CO)=CCC12	-6.86829	0.933779	374.342	-3.415
T2970	O(C)c1c(OC)cc2c(OCC3Oc4c(C(=O)C23)ccc2OC(C(=C)C)Cc42)c1	-6.86502	3.74312	394.423	3.11374
T0760	OC1CC=2C(C)(C3C(C4C(C)(C(C(CCCC(C)C)C)CC4)CC3)CC=2)CC1	-6.8471	1.50297	386.664	7.273
T2966	OC1CC=2C(C)(C3C(C4C(C)(C(C(CCC(C(C)C)CC)C)CC4)CC3)CC=2)CC1	-6.83325	1.6225	414.718	8.073
T1331	P(=O)(OCC(O)C(O)C([O-])CN1c2c(N=C3C(=O)NC(=O)N=C13)cc(C)c(C)c2)(O)O	-6.82971	1.95137	455.34	-1.63
T1160	O=C(O)/C(/CC/C=C(\C)/C)=C/1\C(OC(=O)C)CC2(C)C3(C)C(C4(C)C(C(C)C(O)CC4)CC3)C(O)CC\12	-6.82556	2.9431	516.719	4.886
T3150	O=C(OC1C2(C)C(O)(C(=O)C)CCC2(O)C2(O)C(C3(C)C(=CC2)CC(O)CC3)C1)/C=C(\C(C)C)/C	-6.81597	1.79041	490.637	2.24
T1571	Oc1cc2c(cc1)C1C(C3C(C)(C(O)C(O)C3)CC1)CC2	-6.80506	1.69006	288.387	2.836
T0131	O(C)c1c2Oc3c4OCOc4cc4c3C(N(C)CC4)Cc3ccc(Oc4c(OC)ccc(c4)CC4N(C)CCc(c4c2)c1)cc3	-6.80281	1.79725	606.719	6.782
T0912	O=C(N)C1=C(O)C2(O)C(=O)C3=C(O)c4c(O)cccc4C(O)(C)C3CC2C([N+H](C)C)C1=O	-6.79997	1.61989	445.448	-0.442
T2980	S(=O)(=O)(OC1C(O)C(OC2C(O)C(O)C(O)C(C(=O)O)O2)C(NC(=O)C)C(O)O1)O	-6.79359	1.91063	463.369	-4.93
T2765	O=C(OC(C(=O)O)Cc1cc(O)c(O)cc1)/C=C/c1cc(O)c(O)cc1	-6.78901	1.83029	360.318	2.831
T6004	O(C)c1c(OC)ccc(CC2NCCc3c2cc(OC)c(OC)c3)c1	-6.77244	0.801999	343.423	3.02448
T1062	O=C(NCc1cc(OC)c(O)cc1)CCCC/C=C/C(C)C	-6.75851	1.98638	305.418	3.563
T2133	P(=O)(OCC1C(O)C(O)C(n2c3ncnc(N)c3nc2)O1)(O)O	-6.74461	2.45228	347.224	-3.20594
T0122	O(C)c1c(O)c2c(C(=O)OC3C(O)C(O)C(CO)OC23)cc1O	-6.73021	0.789495	328.273	-0.875
T2202	O=C(O)CCC(C)C1C2(C)C(C3C(C4(C)C(CC(O)CC4)CC3)CC2)CC1	-6.72945	0.949495	376.581	5.929
T2866	O=C(O)C12C(O)CC3(C)C4(C)C(C5(C)C(C(C)(C)C(O)CC5)CC4)CC=C3C1CC(C)(C)CC2	-6.72557	2.42297	472.71	5.453
T2762	O=C(O)/C(=N\C1C(C)OC(OC2C(O)C(O)C(O)C(O)C2O)C(N)C1)/N	-6.72406	1.4436	379.366	-6.59573
T0034	O=C(OCC(=O)C1(O)C2(C)C(C3C(C(=O)C2)C2(C)C(=CC(=O)CC2)CC3)CC1)C	-6.71265	1.41571	402.487	1.035
T2197	O=C(OC12C3C(C)(C(=O)C(O)C=4C(C)(C)C(O)(C3OC(=O)c3ccccc3)CC(O)C=4C)C(O)CC1OC2)C	-6.71041	1.28533	544.597	1.032
T0864	Ic1c(Oc2cc(I)c(O)c(I)c2)c(I)cc(CC(N)C(=O)O)c1	-6.70989	2.15245	776.872	4.67927
T2718	O(C)c1c(OC)ccc2c1c[n+]1c(-c3c(cc(OC)c(OC)c3)CC1)c2	-6.70591	1.43887	352.41	4.03948
T2901	O=C1C(c2ccc(O)cc2)=COc2c1ccc(OC1C(O)C(O)C(O)C(CO)O1)c2	-6.68092	2.24654	416.382	-0.076
T2805	O=C(OC1C(O)C(O)CC(O)(C(=O)O)C1)/C=C/c1cc(O)c(O)cc1	-6.66791	0.683201	354.311	0.415
T2886	O=C(O)CCCCCCCC(O)C(O)CCCCCCO	-6.66288	1.14019	304.427	2.905
T2828	O=C(O)C(CCCCCCCCCC)C1(C(=O)O)OC(=O)CC1	-6.65821	1.90983	328.405	3.87
T2742	O=C1c2c(O)cc(CO)cc2C(C2C(O)C(O)C(O)C(CO)O2)c2c1c(O)ccc2	-6.64918	0.967313	418.398	-0.319
T2986	O(C)c1c(OC)ccc2c1c[n+]1c(-c3c(cc(O)c(OC)c3)CC1)c2	-6.64885	1.6848	338.383	4.02374
T2799	OC(CC/C=C(\C)/C)(C)C1C2C(C)(C3(C)C(C4(C)C(C(C)(C)C(O)CC4)CC3)CC2O)CC1	-6.64633	2.06703	460.743	6.413
T2882	O=C1C(c2ccc(O)cc2)=COc2c1c(O)cc(OC1C(O)C(O)C(O)C(CO)O1)c2	-6.63603	2.28445	432.381	-0.349
T3254	OC/C=C(\CCCC(CCCC(CCCC(C)C)C)C)/C	-6.63104	1.07712	296.539	6.821
T2763	OC1C(C)(C)C2C(C)(C3C(C)(C4(C)C(C(O)C3)C(C3(C)OC(C)(C)CCC3)CC4)CC2)CC1	-6.629	1.23375	460.743	7.524
T0771	O=C1c2c(O)cc(CO)cc2C(OC2C(O)C(O)C(O)C(CO)O2)c2c1c(O)ccc2	-6.62752	1.75274	434.397	-0.148
T2780	O(C1C(O)C(O)C(O)C(CO)O1)C1OC=CC2C(O)C3C(CO)(O3)C12	-6.61142	2.07913	362.331	-3.845
T0269	ClC12C3(C)C(=CC(=O)C=C3)CCC1C1C(C)(C(O)(C(=O)COC(=O)C)CC1)CC2Cl	-6.60715	1.95618	455.378	4.069
T3002	O=C(/C=C/C=C/c1cc2OCOc2cc1)N1CCCCC1	-6.60381	0.725273	285.343	3.369
T1304	Clc1c2C(O)(C)C3C(C(=O)C4(O)C(O)=C(C(=O)N)C(=O)C(N(C)C)C4C3)=C(O)c2c(O)cc1	-6.59038	0.962946	478.885	0.148
T2842	O(C)c1c(OC)c(OC)c2OC(c3ccc(OC)cc3)=CC(=O)c2c1OC	-6.57998	2.23031	372.373	2.41122
T2926	O(C)c1c(OC)c2-c3c(OC)c(OC)c(OC)cc3CCCCc2cc1OC	-6.57921	2.13201	388.46	3.71896
T1207	O=C(OC1C2C(CCC3OC(=O)CC(O)C3)C(C)C=CC2=CC(C)C1)C(CC)C	-6.57776	2.83039	404.547	4.064
T2832	O(C)c1c(OC)cc2c3c1-c1c(O)c(OC)ccc1CC3N(C)CC2	-6.57551	1.60345	341.407	3.18674
T2717	O(CCc1ccc(O)cc1)C1C(O)C(O)C(O)C(CO)O1	-6.56715	1.53366	300.307	-0.752
T1922	O=C(O)/C(=C/C=C/C1(C)OC(=O)C23C(OC(=O)C)(C1CC2)CCC(C(=O)OC)=CC3)/C	-6.5639	3.49658	432.469	2.358
T2788	O=C(OC12C3C(C)(C(=O)C(OC(=O)C)C=4C(C)(C)C(O)(C3OC(=O)c3ccccc3)CC(O)C=4C)C(O)CC1OC2)C	-6.5624	2.82211	586.634	1.621
T1261	O=C(OCC1C2(C)C(=CC(=O)C1)CCC1C2CCC2(C)C(C(=O)C)CCC12)C	-6.56212	1.19796	386.532	3.041
T0683	O=C(OC1C2C(CCC3OC(=O)CC(O)C3)C(C)C=CC2=CCC1)C(CC)C	-6.55589	2.50605	390.52	3.694
T0150	S(=O)(=O)(NC(=O)NC1CCCCC1)c1ccc(C(O)C)cc1	-6.54539	1.59383	326.417	2.318
T2782	O=C(OC)C12c3[nH]c4c(c3CCN3C1C(CC)=CC(C2)C3)cccc4	-6.54528	1.74627	336.435	3.363
T0905	S(SCc1c(CO)c(O)c(C)nc1)Cc1c(CO)c(O)c(C)nc1	-6.53671	1.25503	368.478	1.752
T2921	O(C)c1c(O)c2c(cc1)CC1N(C)CCC32C1C=C(OC)C(=O)C3	-6.53548	1.21294	329.396	1.419
T0809	O=C1C(CC=2C(=O)Oc3c(C=2O)cccc3)=C(O)c2c(O1)cccc2	-6.53336	1.11619	336.299	3.656
T2962	OC1CC2C(C)(C3C(C4C(C)(C(C(CCCC(C)C)C)CC4)CC3)CC2)CC1	-6.51902	2.42016	388.68	8.533
T0685	O=C(OC/C=C(\C=C\C=C(/C=C/C=1C(C)(C)CCCC=1C)\C)/C)C	-6.50161	2.52689	328.496	5.019
T2770	O=C1OCC=C2C(C=C)C(OC3C(O)C(O)C(O)C(CO)O3)OC=C12	-6.49709	3.40672	356.327	-1.828
T2881	O=C1C=C2C3(O)C(C)(C(C(O)(C(O)CCC(O)(C)C)C)CC3)CCC2C2(C)C1CC(O)C(O)C2	-6.49355	1.69934	480.642	1.867
T2967	OC1CC=2C(C)(C3C(C4C(C)(C(C(/C=C/C(C(C)C)CC)C)CC4)CC3)CC=2)CC1	-6.4832	1.16077	412.702	7.149
T2781	C[n+]1c2c3c(cc4OCOc4c3)ccc2c2c(c3OCOc3cc2)c1	-6.46762	0.868137	332.335	4.84
T2802	O=C(OC)Nc1[nH]c2c(n1)ccc(C(=O)c1sccc1)c2	-6.44657	1.26928	301.326	2.314
T2744	O=C(OC)CCC(C)C1C2(C)C(O)CC3C4(C)C(CC(O)C3C2CC1)CC(O)CC4	-6.44654	2.23215	422.606	4.163
T2998	O=C1C(O)C(c2cc(O)c(O)c(O)c2)Oc2c1c(O)cc(O)c2	-6.44241	1.00788	320.253	1.173
T0981	O(C)c1c(OC)ccc2C(C3N(C)CCc4c3c(OC)c3OCOc3c4)OC(=O)c12	-6.4374	1.31934	413.426	2.79474
T2836	O(C)c1c(O)ccc(C2=C(O)C(=O)c3c(O)cc(O)cc3O2)c1	-6.42884	0.921791	316.265	2.296
T0853	OCC1C(O)C(O)C(n2c3ncnc(N)c3nc2)O1	-6.42746	1.33696	267.245	-2.31894
T1183	OC/C=C(\C=C\C=C(/C=C/C=1C(C)(C)CCCC=1C)\C)/C	-6.41995	0.668252	286.459	4.43
T2752	OCC1C(O)CC(n2c3ncnc(N)c3nc2)O1	-6.41885	0.993336	251.246	-1.30394
T2731	O=C(C)c1c(O)c(C)c(O)c2C3(C)C(=O)C(C(=O)C)C(=O)C=C3Oc12	-6.41383	0.939858	344.319	1.301
T2937	O(C)c1c(O)c(OC)cc(C2c3c(C(O)C4C2C(=O)OC4)cc2OCOc2c3)c1	-6.41208	1.50268	400.383	2.121
T3145	O(C1C(O)C(O)C(O)C(CO)O1)C1C(O)C(O)C(O)C(CO)O1	-6.40965	1.79156	342.297	-4.848
T2885	O=C1Oc2c(cc(OC3C(O)C(O)C(O)C(CO)O3)c(O)c2)C=C1	-6.40957	1.14747	340.284	-0.633
T0585	O(C(C(O)C(O)CO)C(O)CO)C1C(O)C(O)C(O)C(CO)O1	-6.40792	1.56029	344.313	-5.306
T0970	O=C(OC1CC2N(C)C(CC2O)C1)C(CO)c1ccccc1	-6.40518	1.04506	305.374	1.387
T0375	O=C(OC1CC2N(C)C(C1)CC2)C(CO)c1ccccc1	-6.39966	2.33647	289.375	2.402
T2963	O=C(O)CCC(C)C1C2(C)C(O)CC3C4(C)C(CC(O)C3C2CC1)CC(O)CC4	-6.39561	1.82937	408.579	3.899
T0822	Oc1c(O)ccc(C2C(O)Cc3c(O)cc(O)cc3O2)c1	-6.38443	1.26404	290.271	1.979
T0047	O(C)c1c(OC)cc2c(N3C(=O)CC4OCC=C5C6C4C3C32C(N(C5)CC3)C6)c1	-6.38248	2.4861	394.471	0.77374
T2869	O=C1c2c(O)cc(O)cc2C(=O)c2c1c(O)cc(C)c2	-6.36507	1.2416	270.24	2.482
T0584	O(C1C(O)C(O)C(O)OC1CO)C1C(O)C(O)C(O)C(CO)O1	-6.36347	2.92294	342.297	-4.848
T0433	O=C(OC1C(C)C2C34OOC(C)(OC3O1)CCC4C(C)CC2)CCC(=O)O	-6.36222	2.48563	384.425	3.721
T2615	Clc1c(C=2Oc3c(c(O)cc(O)c3C(=O)C=2)C2C(O)CN(C)CC2)cccc1	-6.35876	1.29131	401.846	2.902
T0579	O=C1C(O)=C(c2cc(O)c(O)c(O)c2)Oc2c1c(O)cc(O)c2	-6.35766	0.982154	318.237	1.759
T2733	OC1CC2C(C)(C3C(C4C(C)(C5C(C)C6(OC5C4)OCC(C)CC6)CC3)CC2)CC1	-6.34562	2.33146	416.646	7.19
T2859	O(C)c1ccc(C=2C(=O)c3c(O)cc(O)cc3OC=2)cc1	-6.34404	0.925491	284.267	2.179
T1704	O(C)c1c(O)cc(C=2Oc3c(c(O)cc(O)c3)C(=O)C=2)cc1	-6.33503	2.1324	300.266	2.525
T1738	O=C1C(O)C(c2cc(O)c(O)cc2)Oc2c1c(O)cc(O)c2	-6.31056	0.863988	304.254	1.446
T3039	O=C(O)C12C(C=3C(C)(C4(C)C(C5(C)C(C(CO)(C)C(O)CC5)CC4)CC=3)CC1)CC(C)(C)CC2	-6.31027	1.79052	472.71	5.261
T2924	O=C(CCc1ccc(O)cc1)c1c(O)cc(O)cc1O	-6.30764	2.02801	274.272	2.435
T2825	OC1CC=2C(C)(C3C(C4C(=C(C)C5(C(C)C6NCC(C)CC6O5)CC4)C3)CC=2)CC1	-6.30583	2.11348	411.63	3.753
T2946	S(=O)(=O)([O-])c1c(C)c2C(=O)C(=O)c3c(-c2o1)ccc1C(C)(C)CCCc31	-6.30537	0.870007	373.405	2.806
T0772	OC(O)(O)CC/C=C(\C=C\C=C(/C=C/C=1C(C)(C)CCCC=1C)\C)/C	-6.30465	3.77788	346.511	4.029
T2987	Oc1c(O)cc(C2C(O)Cc3c(O)cc(O)cc3O2)cc1O	-6.29977	1.3428	306.27	1.706
T2774	OC1C(O)C2c3c(cc4OCOc4c3)CN3C2C(=C1)CC3	-6.29965	1.10117	287.315	0.381
T0437	O=C1N=CNc2n(C3C(O)C(O)C(CO)O3)cnc12	-6.28659	0.981961	268.229	-1.901
T1286	O=C(OC)C1(O)n2c3c(c4c2C2C(CC)(C1)CCCN2CC4)cccc3	-6.27873	0.672861	354.45	4.326
T1709	O=C1N=CNc2n(C3OC(CO)C(O)C3)cnc12	-6.27226	1.19657	252.23	-0.886
T1123	O=C1C(O)(CC)C2=C(C(=O)N3C(c4nc5c(cc4C3)cccc5)=C2)CO1	-6.26658	2.5732	348.358	2.304
T2830	O=C(O)C12C(C(C(=C)C)CC1)C1C(C)(C3(C)C(C4(C)C(C(C)(C)C(O)CC4)CC3)CC1)CC2	-6.26421	1.67658	456.711	6.726
T2565	O(C)c1c(O)cc(C2Oc3c(c(O)cc(O)c3)C(=O)C2)cc1	-6.2574	1.14824	302.282	2.371
T1718	O=C(NC(CO)C)C1C=C2c3c4c([nH]cc4CC2N(C)C1)ccc3	-6.24998	1.60916	325.412	1.398
T0419	O=C(OC1C2(C)C(C3C(C4(C)C(=CC(=O)CC4)CC3)CC2)CC1)CC	-6.24724	1.52123	344.495	4.166
T0690	O(C)c1cc2c(C(O)C3N4CC(C=C)C(C3)CC4)ccnc2cc1	-6.23892	1.01489	324.424	2.77
T2972	O=C1N2C(=Nc3c1cccc3)c1[nH]c3c(c1CC2)cccc3	-6.23766	1.20935	287.322	3.01
T2867	OC1CC=2C(C)(C3C(C4C(C)(C5C(C)C6(OC5C4)OCC(C)CC6)CC3)CC=2)CC1	-6.23058	2.08358	414.63	5.93
T2174	O=C1C(O)=C(c2cc(O)c(O)cc2)Oc2c1c(O)cc(O)c2	-6.21745	1.3909	302.238	2.032
T1633	C(=C\C=C\C=C(/C=C/C=C(\C=C\C=1C(C)(C)CCCC=1C)/C)\C)(\C=C\C=C(/C=C/C=1C(C)(C)CCCC=1C)\C)/C	-6.21102	6.30747	536.888	17.438
T1614	O=C(CO)C1(O)C2(C)C(C3C(C4(C)C(=CC(=O)CC4)CC3)C(O)C2)CC1	-6.2104	1.39317	362.466	1.014
T2999	O(c1ccc(CO)cc1)C1C(O)C(O)C(O)C(CO)O1	-6.20894	4.45795	286.28	-1.188
T2897	O=C1C(C(O)C/C=C(\C)/C)=CC(=O)c2c(O)ccc(O)c12	-6.20801	2.15568	288.299	1.277
T0461	O(C)c1c(OC)ccc2c1c[n+]1c(-c3c(cc4OCOc4c3)CC1)c2	-6.20492	3.52997	336.367	4.04574
T2771	O(c1cc(O)cc(C)c1)C1C(O)C(O)C(O)C(CO)O1	-6.2042	1.94348	286.28	-0.565
T2182	O=C(OC1CC2N(C)C(C3OC23)C1)C(CO)c1ccccc1	-6.19409	0.93871	303.358	1.326
T2835	O=C1C(O)=C(c2c(O)cc(O)cc2)Oc2c1c(O)cc(O)c2	-6.18986	0.984754	302.238	2.032
T1688	OC(C)C1C2(C)C(C3C(C4(C)C(CC(O)CC4)CC3)CC2)CC1	-6.18713	1.68708	320.517	4.862
T2783	O=C(OC)CC1C(CCCCC)C(=O)CC1	-6.17902	2.16248	226.316	2.393
T2838	O=C1c2c(O)cc(O)cc2OC(c2ccc(O)cc2)C1	-6.17263	1.522	272.256	2.38
T0036	O=C(O)C1(C)CC2C(C)(CCC3(C)C4(C)C(C(=O)C=C23)C2(C)C(C(C)(C)C(O)CC2)CC4)CC1	-6.17156	2.0358	470.694	5.593
T0799	O(C1C(O)C(O)(CO)OC1CO)C1C(O)C(O)C(O)C(CO)O1	-6.17004	1.28466	342.297	-4.366
T2968	O=C(O)CCC(C)C1C2(C)C(C3C(C4(C)C(C(O)C3)CC(O)CC4)CC2)CC1	-6.16342	1.52735	392.58	4.914
T0301	O=C1C=C2C(C)(C3C(C4C(C)(C(O)(C#C)CC4)CC3)CC2)CC1	-6.15953	2.11036	312.453	3.474
T1335	O=C(O)CC/C(=C\Cc1c(OC)c(C)c2c(c1O)C(=O)OC2)/C	-6.15035	2.22983	320.341	2.23
T2965	O=C(O)CCC(C)C1C2(C)C(O)CC3C4(C)C(CC(O)CC4)CCC3C2CC1	-6.1446	1.56616	392.58	4.914
T2827	O=C(O)C12C(C(C)C(C)CC1)C=1C(C)(C3(C)C(C4(C)C(C(CO)(C)C(O)C(O)C4)CC3)CC=1)CC2	-6.14105	2.49584	488.709	4.205
T3143	O=C(OC1C2(C)C(C3C(C4(C)C(CC(=O)C(C)C4)CC3)CC2)CC1)CC	-6.13252	1.81485	360.538	5.088
T1027	O=C1c2c(O)cc(O)cc2OC(c2cc(O)c(O)cc2)=C1	-6.12939	1.2366	286.239	2.261
T0167	O=C(OCC)C=1n2c3c(c4c2C2C(CC)(C=1)CCCN2CC4)cccc3	-6.12896	1.63728	350.462	4.494
T2177	O=C1C(O)=C(c2ccc(O)cc2)Oc2c1c(O)cc(O)c2	-6.12048	1.31547	286.239	2.305
T3001	Oc1c(CC=C)cc(-c2c(O)ccc(CC=C)c2)cc1	-6.11931	1.42509	266.34	5.164
T2879	O=C1C(O)=C(c2cc(O)c(O)cc2)Oc2c1ccc(O)c2	-6.11263	1.38138	286.239	2.305
T0894	OCCc1c(C)[n+](Cc2c(N)nc(C)nc2)cs1	-6.11032	1.99259	265.361	0.474
T2908	O=C(O)CCCCCCCCCCCCCCC	-6.10857	1.8557	256.43	6.142
T0725	O=C(/C=C/c1ccc(O)cc1)c1c(O)cc(O)cc1	-6.10357	3.54537	256.257	3.176
T3246	O=C(OC)C1=C2Nc3c(cccc3)C32C2C(CC)(C=CCN2CC3)C1	-6.09855	2.90822	336.435	3.262
T0473	O(c1ccc(O)cc1)C1C(O)C(O)C(O)C(CO)O1	-6.08324	2.16548	272.253	-0.974
T0443	O(c1c(CO)cccc1)C1C(O)C(O)C(O)C(CO)O1	-6.08057	1.72701	286.28	-1.19
T0722	O=C(O)C12C(C(C)C(C)CC1)C=1C(C)(C3(C)C(C4(C)C(C(C)(C)C(O)CC4)CC3)CC=1)CC2	-6.07635	2.79984	456.711	6.427
T2779	O=C(NCCO)C=1[N+](=O)c2c(N([O-])C=1C)cccc2	-6.0718	1.75406	263.253	0.985
T1424	Oc1cc2c(cc1)C1C(C3C(C)(C(O)(C#C)CC3)CC1)CC2	-6.07141	1.43746	296.41	4.223
T1334	O(C)c1cc2c(C(O)C3N4CC(CC)C(C3)CC4)ccnc2cc1	-6.07077	1.33238	326.44	3.405
T2773	O=C(OC1C(O)(C(=O)OC)C2N(C)c3c(ccc(OC)c3)C32C2C1(CC)C=CCN2CC3)C	-6.06885	1.2733	456.539	1.59
T0948	O=C(CO)C1C2(C)C(C3C(C4(C)C(=CC(=O)CC4)CC3)C(O)C2)CC1	-6.06779	1.21674	346.467	1.466
T0116	Oc1ccc(C(c2ccc(O)cc2)c2ccc(O)cc2)cc1	-6.05023	2.2055	292.334	4.675
T1429	O=C(C)C1C2(C)C(C3C(C4(C)C(O)CC(=O)C=C4CC3)CC2)CC1	-6.04493	2.49419	330.468	2.286
T0804	O=C1C(CC)C(Cc2n(C)cnc2)CO1	-6.04123	2.65556	208.261	0.856
T2994	O=C(/C=C/c1ccccc1)c1c(OC)cc(O)cc1O	-6.03082	0.822616	270.284	3.475
T0788	O=C1C2(O)OC3C(NC)C(O)C(NC)C(O)C3OC2OC(C)C1	-6.03	1.45865	332.353	-2.046
T3028	O=C(O)C1(C)CC2C3(C)C(C)(C=4C(C)(C=5C(C(C)=C(O)C(=O)C=5)=CC=4)CC3)CCC2(C)CC1	-6.02387	1.87033	450.619	6.106
T2993	OCC1OC(n2c3ncnc(N)c3nc2)C(O)C1	-6.01902	4.05365	251.246	-1.30394
T0012	OC(c1c2c(ncc1)cccc2)C1N2CC(C=C)C(C1)CC2	-6.01816	0.931922	294.398	2.777
T2858	O=C1c2c(O)c(O)c(O)cc2OC(c2ccccc2)=C1	-6.01518	3.23511	270.24	2.493
T2868	O=C1N2C(N(C)c3c1cccc3)c1[nH]c3c(c1CC2)cccc3	-6.0003	1.02372	303.365	3.183
T2846	O(C/C=C(\C)/C)c1c2c(occ2)cc2OC(=O)C=Cc12	-5.99845	0.753984	270.284	3.248
T2845	O(C/C=C(\C)/C)c1c2occc2cc2c1OC(=O)C=C2	-5.99519	1.25274	270.284	3.248
T1686	Oc1c(O)ccc2c1OCC1(O)C2c2c(cc(O)c(O)c2)C1	-5.9894	2.39552	302.282	1.648
T2955	O=C(O)C1C23C(C45OC(=O)C(C)(C(O)C=C4)C15)CCC(O)(C(=C)C2)C3	-5.98193	2.24286	346.379	0.542
T2738	O=C1/C(=C/CC2C(=C)CCC3C(CO)(C)C(O)CCC23C)/C=CO1	-5.97047	2.01849	332.44	2.208
T1638	O=C(NC1C(C(O)C(O)CO)OC(O)(C(=O)O)CC1O)C	-5.9668	1.99868	309.271	-3.008
T0130	O=C(Oc1cc2C3(C)C(N(C)c2cc1)N(C)CC3)NC	-5.96654	1.85024	275.352	1.719
T2865	O=C(O)C12C(C=3C(C)(C4(C)C(C5(C)C(C(C)(C)C(O)CC5)CC4)CC=3)CC1)CC(C)(C)CC2	-5.96524	1.60754	456.711	6.468
T1225	O=C1C(C(O)CC2CC(=O)NC(=O)C2)CC(C)CC1C	-5.96369	1.68166	281.352	0.538
T2905	O=C1CC2C(C)(C3C(C4C(C)(C(C(CCCC(C)C)C)CC4)CC3)CC2)CC1	-5.96192	2.53907	386.664	7.953
T1399	ClCC1(OC2C(O)C(O)C(Cl)C(CO)O2)C(O)C(O)C(CCl)O1	-5.96018	1.68304	397.635	-0.622
T2175	O=C1c2c(O)cc(O)cc2OC(c2ccc(O)cc2)=C1	-5.95736	1.19652	270.24	2.534
T2992	O=C1c2c(O)cc(O)cc2OC(c2ccccc2)C1	-5.9525	0.59172	256.257	2.688
T2974	OC1C(C(NC)C)C2(C)C(C)(C3C4(C5(C(C(C)(C)C(NC)CC5)CC3)C4)CC2)C1	-5.95238	1.06898	402.667	5.072
T2888	O(C)c1cc(OC)cc(/C=C/c2ccc(O)cc2)c1	-5.95221	1.13895	256.301	4.225
T1085	SCC(NC(=O)CCC(N)C(=O)O)C(=O)NCC(=O)O	-5.95161	4.0203	307.327	-4.53773
T6062	O=C/1OC(C)CCC/C=C/C2C(C(O)/C=C\1)CC(O)C2	-5.94975	1.80385	280.364	2.047
T1238	O=C1C(c2ccc(O)cc2)=COc2c1ccc(O)c2	-5.9438	1.81315	254.241	2.188
T2848	O(C)c1c(C/C=C(\C)/C)c2OC(=O)C=Cc2cc1	-5.93087	2.00404	244.29	3.201
T3017	O=C(OC1C2(C)C=CC3=C4C(=CC(=O)CC4)CCC3C2CC1)C	-5.92607	3.7417	312.409	2.392
T3000	Oc1c(-c2c(O)ccc(CC=C)c2)cc(CC=C)cc1	-5.92542	0.924539	266.34	5.164
T2750	O=C1C(C)C2(O)C34C(=O)OC5C(O)C(C(C)(C)C)C6(C(O)C(=O)OC6O3)C45C(O)C2O1	-5.92431	1.25596	440.401	-1.393
T3232	Oc1c(O)cc2c(C(Cc3ccc(O)cc3)NCC2)c1	-5.92118	4.00553	271.316	2.738
T0842	O=C1C=C2C(C)(C3C(C4C(C)(C(O)CC4)CC3)CC2)CC1	-5.91656	2.05426	288.431	3.102
T1719	O=C1OC=C(C2C3(C)C(O)(C4C(C5(C)C(CC(O)CC5)CC4)CC3)CC2)C=C1	-5.91557	2.00768	386.532	4.161
T3239	O=C(OC/C=C(\CC/C=C(\C)/C)/C)/C(=C\C)/C	-5.9148	2.11021	236.355	2.551
T1051	O=C(O)/C=C(\C=C\C=C(/C=C/C=1C(C)(C)CCCC=1C)\C)/C	-5.91272	4.36636	300.442	4.629
T1116	O=C(O)CCCCC1SCC2NC(=O)NC12	-5.91229	0.620143	244.315	0.319
T0989	O=C(OCC1=C(C(=O)O)N2C(=O)C(N)C2SC1)C	-5.90987	1.17312	272.281	-0.989
T0607	OC1C(C)C2C34OOC(C)(OC3O1)CCC4C(C)CC2	-5.90188	0.921156	284.352	3.577
T2864	C(=C\C=C\C(=C/C=C/C=C(\C=C\C=C(/C=C/C=C(\CC/C=C(\C)/C)/C)\C)/C)\C)(\C=C\C=C(/CC/C=C(\C)/C)\C)/C	-5.89615	3.42705	536.888	16.454
T2748	O=C(CO)C1(O)C2(C)C(C3C(C4(C)C(=CC(=O)CC4)CC3)CC2)CC1	-5.89611	1.60945	346.467	2.029
T3020	OC(C=C)(CCC1C(O)(C)CCC2C(C)(C)CCCC12C)C	-5.89488	1.49185	308.506	5.469
T2801	O=[N+]([O-])c1c2c(C(=O)O)cc3OCOc3c2c2c(c(OC)ccc2)c1	-5.88927	1.68363	341.275	3.65
T1659	O=C(NCCc1c2c([nH]c1)ccc(OC)c2)C	-5.87959	0.724793	232.283	1.778
T2804	OC1C(C)(C)C2C(C)(C3C(C)(C4(C)C(C(O)C3)C(C3(C)OC(C)(C)CCC3)CC4)CC2O)CC1	-5.86638	3.30528	476.742	6.509
T2837	O=C1c2c(O)cc(O)cc2OC(c2ccccc2)=C1	-5.86371	1.51196	254.241	2.842
T2207	O=C1C2(C)C(C3C(C(=O)C2)C2(C)C(=CC(=O)CC2)CC3)CC1	-5.86138	2.12803	300.398	0.908
T3121	OCC12C(C(C(=C)C)CC1)C1C(C)(C3(C)C(C4(C)C(C(C)(C)C(O)CC4)CC3)CC1)CC2	-5.85476	1.81276	442.728	6.912
T2884	O=C(CO)C1(O)C2(C)C(C3C(C(=O)C2)C2(C)C(=CC(=O)CC2)CC3)CC1	-5.83576	1.60311	360.45	0.446
T0052	O=C1N2c3c(cccc3)C34C2C2C(OCC=C5C2CC3[N+H](C5)CC4)C1	-5.83378	1.18195	335.427	1.038
T1737	O=C1C(c2ccc(O)cc2)=COc2c1c(O)cc(O)c2	-5.83296	2.9783	270.24	1.915
T2179	O=C1OCC2=C1CCC1(C)C34OC3C3C(C(C)C)(C(O)C54OC5CC21)O3	-5.83188	1.67705	360.406	1.226
T2729	O(C)c1c(OC)cc2c(OC(=O)C=C2)c1	-5.82961	1.05134	206.197	1.91074
T1507	O=NN(C(=O)NC1C(O)C(O)C(CO)OC1O)C	-5.82395	2.28495	265.222	-2.765
T3003	O=C(O)C(N)Cc1c2c([nH]c1)ccc(O)c2	-5.8178	1.97335	220.228	-1.42773
T2223	N(Cc1occc1)c1ncnc2nc[nH]c12	-5.8103	0.89656	215.216	0.06806
T0144	O=C(O)c1c(C(=O)Nc2c(C)cccc2C)cccc1	-5.80571	0.755885	269.3	3.126
T2933	O(C)c1c(O)cc(O)c2C(=O)C=C(c3ccccc3)Oc12	-5.79878	1.51199	284.267	2.757
T0792	N12C(C3CN4C(C(C1)C3)CCCC4)CCCC2	-5.79764	1.0089	234.387	2.546
T2803	O=C1C(O)(C)C(O)(C)C(C)C(=O)OC2C3N(CC=C3CO1)CC2	-5.79426	0.769593	325.361	0.021
T3090	O=C(O)C1(C)C2C(C)(C3C(C=C(C(C)C)CC3)=CC2)CCC1	-5.79098	1.21769	302.458	3.997
T0530	O=C1c2c(OC(c3ccccc3)C1)cccc2	-5.7786	0.39622	224.259	3.232
T2821	O=C(OCC)/C=C/c1cc(OC)c(O)cc1	-5.7645	0.926024	222.24	2.515
T2572	O=C1C=C2C(C)(C3C(C4C(C)(C(O)(C)CC4)CC3)CC2)CC1	-5.75709	1.34617	302.458	3.509
T1009	O=C1C2(C)C(C3C(c4c(cc(O)cc4)CC3)CC2)CC1	-5.75409	2.09921	270.372	3.24
T2906	O=C1C(=O)c2c(-c3occ(C)c13)ccc1C(C)(C)CCCc21	-5.75247	1.49897	294.35	3.748
T2910	O=C1C(O)=C(c2ccccc2)Oc2c1cccc2	-5.74935	1.93191	238.242	3.157
T1382	Clc1c(OC)cc(OC)c2C(=O)C3(C(OC)=CC(=O)CC3C)Oc12	-5.74624	2.13727	352.77	2.727
T3019	O(C)c1cc(O)c2C(=O)c3c(O)cc(C)cc3C(=O)c2c1	-5.73448	2.58129	284.267	2.746
T2991	C(c1c2c([nH]c1)cccc2)c1c2c([nH]c1)cccc2	-5.73057	1.54889	246.313	4.686
T0724	O(C)c1ccc(C=2C(=O)c3c(OC=2)cc(O)cc3)cc1	-5.71021	0.901532	268.268	2.452
T3014	O=C(O)/C=C(\C=C\C1(O)C(C)=CC(=O)CC1(C)C)/C	-5.70887	3.93219	264.321	1.798
T0610	Oc1c(O)ccc(/C=C/c2cc(O)cc(O)c2)c1	-5.70561	1.51453	244.246	3.424
T2939	O=C(OC1C2(C)C(O)(C3(C)C(O)CCC(C)(C)C3C1O)C(=O)CC(C=C)(C)O2)C	-5.70176	2.848	410.507	1.932
T0392	O=C1C(C)C2C34OOC(C)(OC3O1)CCC4C(C)CC2	-5.70131	1.3457	282.336	3.582
T2751	O=C1C(C)C2(O)C34C(=O)OC5C3(C(O)C2O1)C1(C(O)C(=O)OC1O4)C(C(C)(C)C)C5	-5.69576	2.21122	424.402	-0.378
T2814	O=C1C(=O)C=2C(C)COC=2c2c1c1c(C(C)(C)CCC1)cc2	-5.67868	1.5409	296.366	3.548
T2816	O=C1c2c(c(O)c(O)cc2)OC(c2ccccc2)=C1	-5.64595	0.867221	254.241	2.766
T2898	O=C1/C(=C/CC2C(=C)CCC3C(CO)(C)C(O)CCC23C)/C(O)CO1	-5.64234	0.642909	350.455	1.411
T0478	O=C(C)C1C2(C)C(C3C(C4(C)C(=CC(=O)CC4)CC3)CC2)CC1	-5.63914	1.80159	314.469	3.301
T2876	O=C1c2c(OC(c3ccccc3)=C1)cccc2	-5.63597	0.70871	222.243	3.386
T3250	O=C(O)/C=C/CCCCCCCO	-5.62993	0.684523	186.251	2.043
T0439	O=C(O)C(N)Cc1c2c([nH]c1)cccc2	-5.61762	0.743811	204.229	-1.15673
T0200	O=C(O)CCCCC1SSCC1	-5.61754	0.735987	206.33	2.926
T2984	O(C)c1c(O)cc2OC(=O)C=Cc2c1	-5.60695	1.04587	192.17	1.895
T2758	O=C(O)C12C(C(C)C(C)CC1)C=1C(C)(C3(C)C(C4(C)C(C(CO)(C)C(O)C(O)C4)C(O)C3)CC=1)CC2	-5.60544	3.94901	504.708	3.19
T3227	O=C(O)C(O)Cc1cc(O)c(O)cc1	-5.60228	1.06575	198.174	0.517
T6377	N12C(C3C=C4C(NCCC4)C(C1)C3)CCCC2	-5.59205	1.15419	232.371	1.702
T2746	O=C1N2C(C3C4N(CCC3)CCCC4C2)CC=C1	-5.59076	2.18046	246.354	1.399
T2790	O=C1C(=C)C2C(O)C31C1(O)C(O)C4C(C)(C)CCC(O)C4(C3CC2)CO1	-5.56875	1.73874	364.438	0.418
T2195	O=C1C2(C)C(C3C(C4(C)C(CC(O)CC4)CC3)CC2)CC1	-5.56677	1.93877	290.447	3.623
T2895	OC1C(C)(C)C2C(C)(C3C(C)(C4(C)C(C5C(C)(CC4)CCC5C(=C)C)CC3)CC2)CC1	-5.55974	2.12601	426.729	8.119
T1653	Ic1c(Oc2cc(I)c(O)cc2)c(I)cc(CC(N)C(=O)O)c1	-5.54361	2.09147	650.976	3.45427
T2847	O=C1/C(=C\2/C(=O)c3c(N/2)cccc3)/Nc2c1cccc2	-5.5357	2.21402	262.268	2.602
T3007	N(CCCN)CCCCNCCCN	-5.53482	1.0737	202.346	-0.556
T1071	OC(CNC)c1cc(O)c(O)cc1	-5.51716	1.33737	183.207	0.533
T1558	Oc1cc(O)cc(/C=C/c2ccc(O)cc2)c1	-5.51437	3.75124	228.247	3.697
T0625	O=C1N(C)c2ncn(C)c2C(=O)N1	-5.5083	0.850452	180.167	-0.801
T2205	O=C(O)Cn1c2C(=O)N(C)C(=O)N(C)c2nc1	-5.49875	0.66779	238.203	-1.099
T1431	O(C)c1c2c(c(OC)c3OC(C)=CC(=O)c13)occ2	-5.49654	2.089	260.245	1.898
T2786	O=C1N2C(C3C4[N+]([O-])(CCC3)CCCC4C2)CC=C1	-5.49048	1.53708	262.353	1.251
T1166	Cc1c2[nH]c3c(c2c(C)c2c1ccnc2)cccc3	-5.48973	1.16859	246.313	4.284
T2210	O=C(OC)C1=COC(O)C2C(CO)=CCC12	-5.48936	1.07871	226.228	-1.235
T3248	O=C(O)C1(C)C(O)CCC2(C)C3C(C)(C4(C)C(C5C(C)(CC4)CCC(C)(C)C5)=CC3)CCC12	-5.4876	1.13314	456.711	6.468
T2749	O=C1C(C)C2(O)C34C(=O)OC5C3(C3(C(O)C(=O)OC3O4)C(C(C)(C)C)C5)CC2O1	-5.48569	1.61268	408.403	0.637
T2797	O(C)C1=CC2=NC3=C(C)NCCC3=C2C=C1	-5.47642	1.74925	214.268	1.474
T1711	O(C)c1cc2[nH]c3c(C)nccc3c2cc1	-5.47284	3.35119	212.252	2.92053
T2870	O=C1N2C(C3C4N(CCC3)CCCC4C2)CCC1	-5.45118	3.11974	248.37	1.639
T3244	S(=O)(=O)([O-])NC1C(O)C(O)C(CO)OC1O	-5.44315	1.4208	258.227	-3.532
T0800	O=C1c2c(O)cccc2C(=O)c2c1c(O)ccc2	-5.43742	2.45564	240.214	2.344
T2829	O=C1C(=C)C2C(O1)CC1(C)C(C(=C)CCC1)C2	-5.4141	2.94798	232.323	2.716
T1048	Oc1cc2c(cc1)C1C(C3C(C)(C(O)CC3)CC1)CC2	-5.40876	2.68827	272.388	3.851
T2843	O=C1c2c(O)cc(CO)cc2C(=O)c2c1c(O)ccc2	-5.39823	1.58575	270.24	1.896
T2893	O=C1CC(C)CCCCCCCCCCCC1	-5.39496	3.32356	238.415	5.331
T2949	O=C1c2c(O)c(O)ccc2C(=O)c2c1cccc2	-5.39332	3.12112	240.214	2.344
T0465	O=C1Oc2c(O)c(O)cc3C(=O)Oc4c(O)c(O)cc1c4-c23	-5.3906	1.2295	302.194	1.946
T3026	O=C1NC2=C(C3(N)/C(=C\C)/C(C=C(C)C3)C2)C=C1	-5.38272	0.686966	242.322	0.517
T2942	O=C1Oc2c(cc3c(occ3)c2)C=C1	-5.38227	0.437646	186.166	2.519
T3143	O=C1CC(C)C2(C)C3C(C4C(C)(C(O)CC4)CC3)CCC2C1	-5.37292	1.19991	304.474	4.012
T2877	O=C(O)C(O)C(O)C(O)C(O)C(=O)O	-5.3644	1.80941	210.138	-2.992
T2890	Oc1ccc(CCN(C)C)cc1	-5.34593	2.31279	165.236	1.735
T0479	O=C1N2C(=CC=C1)C1CNCC(C2)C1	-5.32477	0.544305	190.246	0.246
T2997	O=C(O)c1cc(O)c2C(=O)c3c(O)cccc3C(=O)c2c1	-5.32369	1.29634	284.223	2.095
T2907	O=C1C(=O)c2c3c(c(C)ccc3)ccc2-c2occ(C)c12	-5.31934	2.67799	276.291	3.49
T1287	OC(CNC)c1ccc(O)cc1	-5.31478	2.10553	167.208	0.806
T3240	OCCC(CC/C=C(\C)/C)C	-5.31351	2.91274	156.269	2.182
T0927	O=C(OCCCC)c1ccc(O)cc1	-5.31192	1.35436	194.23	2.936
T1202	O=C1N(C)C(c2cnccc2)CC1	-5.30216	1.04788	176.219	0.468
T1548	O(C)c1c2occc2cc2c1OC(=O)C=C2	-5.29612	0.657421	216.192	2.434
T0856	O=C1C2(C)C(C3C(C4(C)C(=CC3)CC(O)CC4)CC2)CC1	-5.28566	1.27148	288.431	2.363
T2853	OC12C(C(C)C)CC3(C(C)CCC3C(=C)C1)O2	-5.28376	1.20731	236.355	3.785
T2754	O=C1N2C(C3C4[N+]([O-])(CCC3)CCCC4C2)CCC1	-5.25831	1.30114	264.369	1.491
T2875	O=C1Oc2c3c(occ3)ccc2C=C1	-5.24848	1.2376	186.166	2.443
T2904	O=C1OC2(C)C(C3(C)C(C(C)(C)CCC3)CC2)C1	-5.2444	0.783007	250.382	4.288
T1390	O=C(NCCCO)C(O)C(CO)(C)C	-5.24305	1.63298	205.254	-0.903
T2900	O=C(C)c1c(O)cc(OC)cc1	-5.23682	4.86753	166.176	1.442
T2983	O=C(O)/C=C/c1cc(OC)c(OC)c(OC)c1	-5.23249	1.11609	238.239	1.66848
T2826	O=Cc1c(OC)cc(OC)c(OC)c1	-5.22784	2.99514	196.202	1.52274
T2945	O=C1/C(=C(/C)\C)/C/C=C(\C)/CC/C=C(\C)/C1	-5.22437	1.04516	218.34	2.083
T2956	O=C(OC1(C)C23C(C(C)(C)C(C(C)CC2)C3)CC1)C	-5.21796	1.95071	264.409	4.613
T0558	O=C(O)CCc1cc(OC)c(O)cc1	-5.21712	1.41837	196.202	1.442
T2785	O(C)c1cc2OC(=O)C=C(C)c2cc1	-5.21325	2.36158	190.198	2.212
T2818	O=C(OC)c1cc(OC)c(O)cc1	-5.20946	1.2923	182.175	1.53
T3152	O=C1C=C2NC3=C(C)NC=CC3=C2C=C1	-5.19586	2.3062	198.225	1.412
T2215	O=C(O)/C=C/c1cc(OC)c(O)cc1	-5.19193	0.795405	194.186	1.91
T2735	O=C(O)c1c(O)ccc(C(=O)C)c1	-5.19168	1.48246	180.159	1.163
T0926	O=C(O)CCCCCCCC(=O)O	-5.18623	1.74099	188.223	1.686
T2982	O=C1c2c(Oc3c1cccc3)cccc2	-5.18603	1.55936	196.205	2.661
T2896	O=C1C(=C)C2C=C3C(C)(CC2O1)CCCC3C	-5.18277	1.09923	232.323	2.738
T0647	NCCc1c2c([nH]c1)cccc2	-5.17202	0.794977	160.22	1.616
T2833	O=C1C(=C)C2C(O1)C1C(=C)CCC1C(=C)CC2	-5.16924	2.19516	230.307	1.759
T2902	O=C1C(=C)C2C(O1)/C=C(/C)\CC/C=C(\C)/CC2	-5.16184	0.849993	232.323	2.083
T2889	O=C(O)/C=C/c1cc(O)c(OC)cc1	-5.15683	1.52999	194.186	1.91
T2819	O=C(OC)/C=C/c1ccc(O)cc1	-5.14934	1.48398	178.187	2.183
T1256	O=C1N(C)C(=O)c2n(C)cnc2N1C	-5.13292	1.56818	194.194	-0.604
T2883	O=C(O)c1cc(OC)c(O)c(OC)c1	-5.1297	3.14508	198.174	1.257
T0877	O=C(O)c1cc(O)c(O)c(O)c1	-5.12882	1.25401	170.12	0.729
T2862	O=C(O)CCc1ccc(O)cc1	-5.12617	1.46285	166.176	1.451
T3159	C(C)(C)c1cc-2c(C)ccc-2c(C)cc1	-5.12567	0.748808	198.309	5.8365
T2903	O=C1C2(C)C(C)(C(=O)O1)C1OC2CC1	-5.12281	1.74497	196.202	0.5
T3154	O=C/C=C(\CC/C=C(\C)/C)/C	-5.12268	1.04732	152.237	1.723
T3011	O=C(O)C(N)CC(=O)c1c(N)cccc1	-5.12069	0.919816	208.217	-2.64173
T2995	O=C1c2c(O)cc(C)cc2C(=O)c2c1c(O)ccc2	-5.11459	1.01951	254.241	2.716
T2807	O=C(O)/C=C/c1cc(O)c(O)cc1	-5.10831	2.49948	180.159	1.646
T3158	Cc1nccc2c1[nH]c1c2cccc1	-5.10341	0.695876	182.226	2.92753
T2800	O=C(O)C(N)CCC(=O)NCC	-5.09655	1.51383	174.2	-3.40073
T2808	O=C1C(O)C23C(O)(C(C)(C)C)CC4OC(=O)CC24C(=O)OC3O1	-5.05277	1.3118	326.301	-0.369
T3234	O=C1OC2(C)C(C(C)(C)CCC2)=C1	-5.04893	0.998982	180.247	2.585
T1681	O=C1N(C)C(=O)c2[nH]cnc2N1C	-5.04584	0.863963	180.167	-0.994
T2798	O=C1Oc2c(cc(O)c(O)c2)C=C1	-5.04315	1.27233	178.143	1.631
T0568	O=C(O)Cc1cc(OC)c(OC)cc1	-5.04057	1.79454	196.202	1.36974
T0416	O=C([O-])C(O)C(O)C(O)C(O)CO	-5.03393	1.37551	195.147	-3.07
T2860	O(C)c1c(O)ccc(CO)c1	-5.00067	1.1048	154.165	1.067
T3262	P(=O)(O)(O)/N=C(\N(CC(=O)[O-])C)/N	-5.00049	2.43084	210.106	-1.35
T2977	O=C(Oc1c(OC)cc(C=O)cc1)C	-4.99518	2.3348	194.186	1.50874
T6391	O=C(C)c1cc(OC)c(O)cc1	-4.98615	0.755224	166.176	1.442
T0775	O=C1Oc2c(cccc2)C=C1	-4.98289	0.683389	146.145	2.175
T2958	O=C(O)C1(O)CC(O)C(O)C(O)C1	-4.97129	2.70742	192.167	-1.899
T1607	OC1N(C)CCc2c1cc1OCOc1c2	-4.97061	1.75526	207.229	1.107
T2887	O=C(O)c1c[n+](C)ccc1	-4.96547	1.27474	138.146	1.235
T3245	O=C1C(C)=CCC(C(=C)C)C1	-4.96431	1.29429	150.221	1.008
T2953	Cc1c(C)nc(C)c(C)n1	-4.96244	2.02154	136.198	1.35313
T2723	O=C1C(C)=CC(=O)CC1(C)C	-4.95836	0.833849	152.193	0.638
T2976	O=C(C(O)C(O)C(O)CO)CO	-4.95598	1.38081	180.156	-3.262
T0449	O=C1C(C)=CC(=O)c2c1cccc2	-4.95185	1.32683	172.183	1.694
T0332	OC(C(O)C(O)CO)C(O)CO	-4.94707	3.27802	182.172	-3.39
T1246	O=C(OC1C2(C)C(C)(C)C(C1)CC2)C	-4.94613	1.52217	196.29	3.1
T2852	O(C)c1c2c(OC(=O)C=C2)cc(OC)c1	-4.94143	1.73976	206.197	2.159
T3095	Oc1ccc(CCN)cc1	-4.94125	1.44341	137.182	0.942
T0469	OC(CN)c1ccc(O)cc1	-4.93967	3.45854	153.181	0.281
T2931	O=C(NCCCC(N)C(=O)O)N	-4.93698	1.7219	175.188	-3.97373
T0429	O=CC(N)C(O)C(O)C(O)CO	-4.92984	2.04145	179.172	-3.163
T0973	OCc1c(O)c(C)ncc1CO	-4.9159	1.52062	169.18	-0.426
T0562	O=C(O)c1cc(O)c(O)cc1	-4.9035	5.28157	154.121	1.002
T1407	OC1C(C(C)C)CCC(C)C1	-4.89878	0.751442	156.269	3.091
T0421	OC1C(O)C(O)C(O)C(O)C1O	-4.89507	1.5671	180.156	-3.5
T2981	O=C(C)c1c(OC)cc(OC)cc1O	-4.89036	1.06058	196.202	1.433
T2969	O=C1C(=O)C=C(O)c2c1cccc2	-4.88802	0.864246	174.155	1.421
T2928	OC1C(O)C(O)OC(C)C1O	-4.88089	1.0292	164.157	-1.897
T2915	OCC1C(O)C(O)C(O)C(O)O1	-4.88056	1.10141	180.156	-2.932
T2724	C=C1C2C(C(C)(C)C2)CCC2(C)OC2CC1	-4.87422	1.55062	220.356	3.668
T2909	O(C)c1c(O)c(O)c2OC(=O)C=Cc2c1	-4.87012	1.18485	208.169	1.546
T2861	OCCc1ccc(O)cc1	-4.86578	1.31961	138.166	1.164
T3123	[SH0](SCC=C)(=O)CC=C	-4.86031	1.79892	162.277	1.133
T2839	O=C(O)c1c(O)cc(O)cc1C	-4.86025	3.01342	168.148	1.335
T2143	O(C)c1c2c(occ2)cc2OC(=O)C=Cc12	-4.85184	1.67029	216.192	2.434
T2857	O=C(O)c1c(O)ccc(O)c1	-4.8325	1.74123	154.121	1.002
T0928	O=C1C(O)=C(O)C(C(O)CO)O1	-4.83085	1.55357	176.124	-1.253
T2851	O=C1Oc2c(O)c(O)ccc2C=C1	-4.82022	0.861376	178.143	1.555
T2739	O=C(O)C1=CC(O)C(O)C(O)C1	-4.8118	1.58903	174.152	-1.626
T2840	O=C(C)c1c(O)cc(O)cc1O	-4.80654	2.58033	168.148	0.905
T0762	O(C)c1ccc(/C=C/C)cc1	-4.79487	1.17627	148.205	2.804
T2863	O=C(O)/C=C/c1ccc(O)cc1	-4.79294	1.561	164.16	1.919
T1297	O(C)c1c(O)ccc(CC=C)c1	-4.79139	1.25899	164.204	2.511
T3018	O=Cc1cc(O)c(O)cc1	-4.78122	1.5783	138.122	1.252
T3241	C(=C)(C)C1CC=C(C)CC1	-4.75555	2.63512	136.238	3.604
T1082	S=C=NCc1ccccc1	-4.74778	1.58961	149.217	3.321
T2952	O=C1C2(C)C(C)(C)C(C1)CC2	-4.73608	0.989364	152.237	1.9
T1362	O=C1N=CNc2nc[nH]c12	-4.73323	1.59481	136.114	-0.336
T2209	Oc1cc2c(CCN)c[nH]c2cc1	-4.72463	1.40547	176.219	1.345
T0032	O=CC(O)C(O)C(O)CO	-4.71689	3.606	150.13	-2.368
T2941	OCC1C(O)C(O)C(N)C(O)O1	-4.71522	1.40062	179.172	-3.154
T3038	OC1C2(C)C(C)(C)C(C1)CC2	-4.70899	1.33019	154.253	2.511
T2772	S(CC(N)C(=O)O)CC=C	-4.70665	1.21828	161.225	-2.18273
T2936	O(C)c1c(OC)cc(O)cc1OC	-4.70141	1.60691	184.191	1.03948
T2841	O=C1C(C)=CC(=O)c2c(O)cccc12	-4.68537	0.62859	188.182	1.384
T3006	O=C(O)/C=C/C=C/c1ccccc1	-4.67981	1.00028	174.199	2.871
T0925	O=C(NC1C(=O)NC(=O)N1)N	-4.66669	0.991897	158.117	-2.575
T1644	Oc1c(O)ccc(CCN)c1	-4.6439	1.78539	153.181	0.669
T2935	NCCc1ccccc1	-4.6325	1.25463	121.183	1.25
T2916	OC12C(C)(C)C3CC(C1(C)CC3)C(C)CC2	-4.62417	0.388947	222.372	4.196
T2185	P(=O)(OC1=C(O)C(C(O)CO)OC1=O)([O-])[O-]	-4.60213	3.21314	254.087	-2.588
T2974	OCc1c2c([nH]c1)cccc2	-4.58665	1.13944	147.177	1.75
T2927	O=C([O-])c1c[n+](C)ccc1	-4.56584	2.4331	137.138	1.356
T1301	O(C)c1c(O)cccc1	-4.56535	2.39375	124.139	1.552
T0496	O=C1N=C(N)N(C)C1	-4.56338	1.68082	113.12	-0.394
T2198	O=C(OC)C1=CCCN(C)C1	-4.54902	0.733274	155.197	0.234
T2570	Oc1c(C)cc(O)c2c1cccc2	-4.53585	1.37428	174.199	2.841
T0746	O=C(O)C=1NC(=O)NC(=O)C=1	-4.53007	1.10149	156.097	-1.048
T1693	O=C1Oc2c(ccc(O)c2)C=C1	-4.51963	1.61036	162.144	1.904
T0326	O=C(O)C(N)CCC(=O)N	-4.51416	1.70566	146.146	-4.09773
T0589	OC(C(O)CO)C(O)CO	-4.49347	4.63718	152.146	-2.817
T2740	O=C(O)/C=C/c1ccccc1	-4.47586	0.458676	148.161	2.227
T0063	O=C(O)C(N)C(CC)C	-4.47392	1.10741	131.175	-1.64373
T1714	CC1(C)OC2(C)CCC1CC2	-4.45786	1.66809	154.253	2.956
T0737	O=C(O)C(N)CCCN	-4.41987	1.47735	132.163	-3.43073
T2975	O=Cc1c(OC)c(OC)ccc1	-4.40073	1.775	166.176	1.49274
T3251	O=C(O)C1[N+](C)(C)CCC1	-4.40008	1.33848	144.194	0.004
T0883	S(=O)(=O)(O)CCCN	-4.35226	1.6818	139.175	-1.325
T0965	NCCc1[nH]cnc1	-4.32884	1.35032	111.148	-1.054
T2944	O=C([O-])C(O)Cc1cc(O)c(O)cc1	-4.32357	1.36117	197.166	0.638
T0587	OC1C(O)C(O)COC1O	-4.26044	1.15595	150.13	-2.359
T2719	O=C(O)CCC(=O)O	-4.25498	3.42182	118.088	-0.524
T0983	SC(C(N)C(=O)O)(C)C	-4.18645	0.791515	149.214	-1.73473
T3243	O=C(O)C[N+](C)(C)C	-4.15253	3.1752	118.156	-0.649
T0583	OC(C(O)CO)CO	-4.10527	2.39683	122.12	-2.244
T3009	O=[N+]([O-])CCC(=O)O	-4.09684	1.90299	119.076	-0.22
T0934	O=C(N)c1cnccc1	-4.09347	2.75929	122.127	-0.384
T0879	O=C(O)c1cnccc1	-4.08661	3.14481	123.111	0.35
T0069	O=C1NC(=O)C=CN1	-4.06365	1.27734	112.088	-1.09
T1589	O=C1C(N)CON1	-3.93928	1.17221	102.093	-1.588
T0743	O=C([O-])CC(O)C[N+](C)(C)C	-3.81554	2.42828	161.201	-1.013
T0508	O=C(O)CCCN	-3.80302	2.71255	103.121	-0.591
T2769	O=C(O)/C=C/C(=O)O	-3.73923	1.97878	116.072	-0.056
T0590	O=C1C(O)=C(O)C(C(O)C[O-])O1	-3.69742	0.740697	175.116	-0.784
T2736	O=C([O-])C1C(C(=O)[O-])C2OC1CC2	-3.22173	0.831655	184.147	-0.228
T0738	O=C(N)N	-3.13137	1.40539	60.056	-1.525
